1 **Accuracy of whole-genome sequence**  
2 **imputation using hybrid peeling in large**  
3 **pedigreed livestock populations**

4

5 Roger Ros-Freixedes<sup>1,2§</sup>, Andrew Whalen<sup>1</sup>, Ching-Yi Chen<sup>3</sup>, Gregor Gorjanc<sup>1</sup>,  
6 William O Herring<sup>3</sup>, Alan J Mileham<sup>4</sup>, John M Hickey<sup>1</sup>

7

8 <sup>1</sup> The Roslin Institute and Royal (Dick) School of Veterinary Studies, The University  
9 of Edinburgh, Easter Bush, Midlothian, Scotland, UK

10 <sup>2</sup> Departament de Ciència Animal, Universitat de Lleida-Agrotecnio Center, Lleida,  
11 Spain.

12 <sup>3</sup> The Pig Improvement Company, Genus plc, 100 Bluegrass Commons Blvd., Ste  
13 2200, Hendersonville, TN 37075, USA.

14 <sup>4</sup> Genus plc, 1525 River Road, DeForest, WI 53532, USA.

15

16 §Corresponding author

17

18 Email addresses:

19 RRF: [roger.ros@roslin.ed.ac.uk](mailto:roger.ros@roslin.ed.ac.uk)

20 AW: [awhalen@roslin.ed.ac.uk](mailto:awhalen@roslin.ed.ac.uk)

21 CYC: [ching-yi.chen@genusplc.com](mailto:ching-yi.chen@genusplc.com)

22 GG: [gregor.gorjanc@roslin.ed.ac.uk](mailto:gregor.gorjanc@roslin.ed.ac.uk)

23 WOH: [william.herring@genusplc.com](mailto:william.herring@genusplc.com)

24 AJM: [alan.mileham@genusplc.com](mailto:alan.mileham@genusplc.com)

25 JMH: [john.hickey@roslin.ed.ac.uk](mailto:john.hickey@roslin.ed.ac.uk)

26

## Abstract

### Background

27 We demonstrate high accuracy of whole-genome sequence imputation in large  
28 livestock populations where only a small fraction of individuals (2%) had been  
29 sequenced, mostly at low coverage.

### Methods

30 We used data from four pig populations of different sizes (18,349 to 107,815  
31 individuals) that were broadly genotyped at densities between 15,000 and 75,000  
32 markers genome-wide. Around 2% of the individuals in each population were  
33 sequenced (most at 1x or 2x and a small fraction at 30x; average coverage per  
34 individual: 4x). We imputed whole-genome sequence with hybrid peeling. We  
35 evaluated the imputation accuracy by removing the sequence data of a total of 284  
36 individuals that had been sequenced at high coverage, using a leave-one-out design.  
37 We complemented these results with simulated data that mimicked the sequencing  
38 strategy used in the real populations to quantify the factors that affected the  
39 individual-wise and variant-wise imputation accuracies using regression trees.

### Results

40 Imputation accuracy was high for the majority of individuals in all four populations  
41 (median individual-wise correlation was 0.97). Individuals in the earliest generations  
42 of each population had lower accuracy than the rest, likely due to the lack of marker  
43 array data for themselves and their ancestors. The main factors that determined the  
44 individual-wise imputation accuracy were the genotyping status of the individual, the  
45 availability of marker array data for immediate ancestors, and the degree of  
46 connectedness of an individual to the rest of the population, but sequencing coverage  
47 had no effect. The main factors that determined variant-wise imputation accuracy

48 were the minor allele frequency and the number of individuals with sequencing  
49 coverage at each variant site. These results were validated with the empirical  
50 observations.

## **Conclusions**

51 The coupling of an appropriate sequencing strategy and imputation method, such as  
52 described and validated here, is a powerful strategy for generating whole-genome  
53 sequence data in large pedigreed populations with high accuracy. This is a critical step  
54 for the successful implementation of whole-genome sequence data for genomic  
55 predictions and fine-mapping of causal variants.

56

## Background

57           In this paper we demonstrate high accuracy of whole-genome sequence  
58 imputation in large livestock populations where only a small fraction of individuals  
59 (2%) had been sequenced, mostly at low coverage. Using data from pig populations  
60 we show that imputation accuracy was very high for individuals that were genotyped  
61 with marker arrays with densities that ranged between 15,000 and 75,000 markers  
62 genome-wide. We also used simulations to quantify the factors that determined the  
63 imputation accuracy achieved for each individual and variant, validated those results  
64 with the empirical observations from real data, and performed robustness tests to  
65 determine the impact of data misassignment and pedigree errors on the imputation  
66 accuracy.

67           Sequence data has the potential to empower the identification of causal  
68 variants that underlie quantitative traits or diseases [1–4], enhance livestock breeding  
69 [5–7], and increase the precision and scope of population genetic studies [8,9]. For  
70 sequence data to be used routinely in research and breeding, low-cost sequencing  
71 strategies must be deployed in order to assemble large data sets that capture most of  
72 the sequence diversity in a population and enable harnessing of its potential. One  
73 possible strategy is to sequence a subset of the individuals in a population at low  
74 coverage and then to perform imputation of whole-genome sequence data for the  
75 remaining individuals [10–12].

76           Such a strategy is likely to perform well in livestock breeding populations,  
77 where individuals have a high degree of relatedness, allowing low-coverage sequence  
78 data to be pooled across individuals that share a haplotype and imputed to individuals  
79 who share that haplotype and have small amounts of sequenced data or who do not  
80 have any sequence data. Due to the implementation of genomic selection in livestock

81 breeding populations, many individuals in breeding nucleus populations have already  
82 been genotyped with marker arrays. This genotype data can be used to identify the  
83 individuals that share haplotype segments and to select individuals for sequencing that  
84 will be more informative from an imputation perspective given a limited budget  
85 [13,14].

86 We have recently proposed ‘hybrid peeling’ [15], a fast and accurate  
87 imputation method explicitly designed for jointly calling, phasing and imputing  
88 whole-genome sequence data in large and complex multi-generational pedigreed  
89 populations where individuals can be sequenced at variable coverage or not  
90 sequenced at all. Hybrid peeling is a two-step process. In the first step, multi-locus  
91 iterative peeling is performed to estimate the segregation probabilities for a subset of  
92 segregating sites (e.g., the markers on a genotyping array). In the second step, the  
93 segregation probabilities are used to perform fast single-locus iterative peeling on  
94 every segregating site discovered in the genome. This two-step process allows the  
95 computationally demanding multi-locus peeling step to be performed on only a subset  
96 of the variants, while still leveraging linkage information for the remaining variants.

97 These properties make hybrid peeling a very appealing imputation method for  
98 the cost-effective generation of whole-genome sequence data for large pedigreed  
99 populations that have already been extensively genotyped using marker arrays and in  
100 which a small proportion of the individuals have been sequenced with variable  
101 coverage. In the situations described, the sequence data will be sparsely distributed  
102 across the pedigree and there may be great variability in the amount of data to which  
103 each individual is exposed. Understanding which factors affect individual-wise and  
104 variant-wise imputation accuracy and how their effects are mediated is important for  
105 determining how this sequencing strategy, together with hybrid peeling, performs in

106 real settings that are common in animal breeding and for enabling accuracy-aware  
107 quality control of the imputed data before downstream analyses. Such knowledge  
108 could be used in the future to design cost-effective routine whole-genome sequencing  
109 strategies.

110 The objectives of this study were to: (i) demonstrate if whole-genome  
111 sequence data could be imputed with high accuracy in a variety of pig pedigrees when  
112 small subsets of individuals are sequenced, mostly at low coverage; (ii) quantify the  
113 factors that determine the individual-wise and variant-wise imputation accuracy; and  
114 (iii) quantify the impact of data misassignment and pedigree errors on imputation  
115 accuracy. Our results showed that high overall imputation accuracies can be achieved  
116 for whole-genome sequence data in large pedigreed populations using hybrid peeling  
117 provided that the individuals are connected to a sufficient number of informative  
118 relatives with marker array or sequence data.

119

120

## Materials and Methods

121 We structured the study in three tests. In Test 1 we evaluated the imputation  
122 accuracy of hybrid peeling in four populations of different sizes by removing the  
123 sequence data of 284 individuals that had been sequenced at high coverage, using a  
124 leave-one-out validation design. In Test 2 we used simulated data based on three other  
125 real pedigrees to quantify which factors determined the individual-wise and variant-  
126 wise imputation accuracy of hybrid peeling with regression trees. We used simulated  
127 data to provide a much larger sample size where the true genotypes were known, and  
128 we then used the observations in the real data to validate the findings. In Test 3, we  
129 evaluated the potential impact that data misassignment and pedigree errors could

130 potentially have on the imputation accuracy by introducing deliberate errors in the  
131 real data. In what follows we first describe how the data was generated and then how  
132 the different tests were performed.

133

## Real data

### 134 *Populations and sequencing strategy*

135 We performed whole-genome sequencing of 4,427 individuals from four  
136 commercial pig breeding lines (Genus PIC, Hendersonville, TN) using a total  
137 coverage of approximately 18,514x. The populations selected for this study differed  
138 in size, and approximately 2% (1.7-2.5%) of the individuals in each population were  
139 sequenced, mostly at low coverage. The first population had 18,349 (20k) individuals  
140 and 445 of these were sequenced with a total coverage of 1,852x. The second  
141 population had 34,425 (35k) individuals and 760 of these were sequenced with a total  
142 coverage of 3,192x. The third population had 68,777 (70k) individuals and 1,366 of  
143 these were sequenced with a total coverage of 5,280x. The fourth population had  
144 107,815 (110k) individuals and 1,856 of these were sequenced with a total coverage  
145 of 8,190x. We sorted the pedigrees of each population so that parents appeared before  
146 their progeny. Thus, relative position in the pedigree was used as a proxy for the  
147 generation to which an individual belonged.

148 We selected the individuals and the coverage at which they were sequenced  
149 using a three-step strategy: (1) we first selected sires and dams that contributed most  
150 genotyped progeny in the pedigree (referred to as ‘top sires and dams’) to be  
151 respectively sequenced at 2x and 1x; (2) conditional on the first step, we used  
152 AlphaSeqOpt part 1 [13] to identify the individuals whose haplotypes represented the  
153 greatest proportion of the population haplotypes (referred to as ‘focal individuals’)

154 and to determine an optimal level of sequencing coverage between 0x and 30x for  
155 these individuals and their immediate ancestors (i.e., parents and grandparents) under  
156 a total cost constraint; and (3) conditional on the second step, we used the  
157 AlphaSeqOpt part 2 [14] to identify individuals that carried haplotypes whose  
158 cumulative coverage was low (i.e., below 10x) and distributed 1x sequencing amongst  
159 those individuals so that the cumulative coverage on the haplotypes could be  
160 increased (i.e., at or above 10x). AlphaSeqOpt used haplotypes inferred from marker  
161 array genotypes (GGP-Porcine HD BeadChip; GeneSeek, Lincoln, NE), which were  
162 phased with AlphaPhase [16] and imputed with AlphaImpute [17]. The sequencing  
163 resources were split so that approximately 30% of the sequencing resources were used  
164 for sequencing the top sires at 2x, 15% for the top dams at 1x, 25% for the focal  
165 individuals and their immediate ancestors at variable coverage [13], and the remaining  
166 30% for individuals that carried under-sequenced haplotypes at 1x [14]. In step 2 we  
167 identified a total of 284 individuals across the four populations who were sequenced  
168 at high coverage (15x or 30x). Of these, 37 belonged to the 20k population, 65 to the  
169 35k population, 92 to the 70k population, and 90 to the 110k population. Many of  
170 these individuals belonged to early generations of the pedigree of each population.  
171 The rest of the sequenced individuals were sequenced at low coverage (1x, 2x or 5x).  
172 The number of individuals sequenced and the coverage at which they were sequenced  
173 is summarized for each population in Table 1.

#### 174 ***Sequencing and data processing***

175 Tissue samples were collected from ear punches or tail clippings. Genomic  
176 DNA was extracted using Qiagen DNeasy 96 Blood & Tissue kits (Qiagen Ltd.,  
177 Mississauga, ON, Canada). Paired-end library preparation was conducted using the  
178 TruSeq DNA PCR-free protocol (Illumina, San Diego, CA). Libraries for sequencing



179 at low coverage (1x to 5x) were produced with an average insert size of 350 base pairs  
180 and sequenced on a HiSeq 4000 instrument (Illumina, San Diego, CA). Libraries for  
181 sequencing at high coverage (15x or 30x) were produced with an average insert size  
182 of 550 base pairs and sequenced on a HiSeq X instrument (Illumina, San Diego, CA).  
183 All libraries were sequenced at Edinburgh Genomics (Edinburgh Genomics,  
184 University of Edinburgh, Edinburgh, UK). Most pigs were also genotyped either at  
185 low density (LD; 15,000 markers) using the GGP-Porcine LD BeadChip (GeneSeek,  
186 Lincoln, NE) or at high density (HD; 75,000 markers) using the GGP-Porcine HD  
187 BeadChip (GeneSeek, Lincoln, NE).

188 DNA sequence reads were pre-processed using Trimmomatic [18] to remove  
189 adapter sequences from the reads. The reads were then aligned to the reference  
190 genome *Sscrofa11.1* (GenBank accession: GCA\_000003025.6; [19]) using the BWA-  
191 MEM algorithm [20]. Duplicates were marked with Picard  
192 (<http://broadinstitute.github.io/picard>). Single nucleotide polymorphisms (SNPs) and  
193 short insertions and deletions (indels) were identified with the variant caller GATK  
194 HaplotypeCaller (GATK 3.8.0; [21,22]) using default settings. Variant discovery with  
195 GATK HaplotypeCaller was performed separately for each individual. A joint variant  
196 set for all the individuals in each population was obtained by extracting the variant  
197 sites from all the individuals. Between 20 and 30 million variants were discovered in  
198 each population.

199 To avoid biases towards the reference allele introduced by GATK when  
200 applied on low-coverage sequence data we extracted the read counts supporting each  
201 allele directly from the aligned reads stored in the BAM files with a pile-up function  
202 using the pipeline described in [23]. This pipeline uses the tool pysam (version 0.13.0;  
203 <https://github.com/pysam-developers/pysam>), which is a wrapper around htlib and

204 the samtools package [24]. We extracted the read counts for all biallelic SNP  
205 positions, after filtering out variants with mean coverage 3 times greater than the  
206 average realized coverage (considered as indicative of potential repetitive regions)  
207 with VCFtools [25].

208 We performed additional quality control on the pedigree by determining the  
209 number of Mendelian inconsistencies (percentage of opposing homozygous) between  
210 each parent-progeny pair. We applied the following criteria: (1) we removed marker  
211 array or sequence data of an individual, when the genotype data was incompatible  
212 with that of all its available parents and progeny (this was done because it could  
213 indicate data misassignment for that individual); (2) we removed parent-progeny  
214 pedigree links when the genotype data available was incompatible for only a pair of  
215 individuals but not for their other parents and progeny; and (3) we created a dummy  
216 parent with no genotype data when the genotype data of a group of littermates was  
217 incompatible with one of its parents but both the parent and the littermates were not  
218 incompatible with the rest of their parents and progeny (this was done to preserve the  
219 full-sib relationship between those individuals).

220

## **Simulated data**

221 In order to test the factors that influenced imputation accuracy, we simulated  
222 genetic data for three populations of different sizes: 15,187 (15k), 29,974 (30k), and  
223 64,598 (65k) individuals. The pedigrees of these populations were a subset of the real  
224 pedigrees of the 20k, 35k, and 110k populations used for the analyses of real data. As  
225 in the analyses of real data, the pedigrees were sorted so that parents appeared before  
226 their progeny. Genomic data for each population was simulated using the software  
227 AlphaSim [26]. Each simulation was repeated twice and results were averaged across

228 repetitions. Below, we present only a brief description of the simulation strategy. The  
229 full details of the simulation are described in a companion paper [27].

230 Genomic data were simulated for 20 chromosomes, each 100 cM in length. A  
231 total of 150,000 SNPs per chromosome (3 million SNPs genome-wide) were  
232 simulated in order to represent whole-genome sequence. A subset of 3,000 SNPs per  
233 chromosome (60,000 SNPs genome-wide) was used as a high-density marker array  
234 (HD). A smaller subset of 300 SNPs per chromosome (6,000 SNPs genome-wide)  
235 nested within the high-density marker array was used as a low-density marker array  
236 (LD). Each individual was assigned HD or LD marker array data based on the density  
237 at which they were genotyped in real data. The sequence read counts for each  
238 individual and SNP were simulated by sampling sequence reads using a Poisson-  
239 gamma model that gave variable sequenceability at each SNP and variable number of  
240 reads for each individual at each SNP [28,29].

241 The individuals to be sequenced and their sequencing coverage were selected  
242 using a combination of pedigree- and haplotype-based methods that emulated the  
243 sequencing strategy that was used for the real data. In implementing this approach, for  
244 simplicity the simulated sequencing resources were split in an equitable way so that  
245 25% of the sequencing resources were used for sequencing top sires at 2x, 25% for  
246 top dams at 1x, 25% for the focal individuals and their immediate ancestors at  
247 variable coverage [13], and the remaining 25% for individuals that carried under-  
248 sequenced haplotypes at 1x [14]. The total level of investment for sequencing was  
249 equivalent to the cost of sequencing 2% of the population at 2x, and thus resulted in a  
250 similar number of sequenced individuals as in the real data.

251

## Imputation using hybrid peeling

252 Imputation was performed in each population separately using hybrid peeling,  
253 as implemented in AlphaPeel [15] with the default settings. Hybrid peeling extends  
254 the methods of Kerr and Kinghorn [30] for single-locus iterative peeling and of  
255 Meuwissen and Goddard [31] for multi-locus iterative peeling to efficiently call,  
256 phase and impute whole-genome sequence data in complex multi-generational  
257 pedigrees with loops. Multi-locus iterative peeling was performed on all available  
258 marker array data to estimate the segregation probabilities for each individual. The  
259 individuals genotyped with LD marker arrays were not imputed to HD prior to this  
260 step. The segregation probabilities were used for segregation-aware single-locus  
261 iterative peeling for the remaining segregating variants.

262

## Imputation accuracy tests

### 263 *Test 1: Imputation accuracy in populations of different size*

264 The imputation accuracy in the real data was estimated using a leave-one-out  
265 design. In each leave-one-out round, hybrid peeling was performed after removing the  
266 sequence data of one of the 284 individuals that were sequenced at high coverage  
267 (either 15 or 30x) in the four populations, which produced a total of 284 validation  
268 rounds across the four populations. We used the genotypes imputed for these  
269 individuals using the full data as the true genotypes. To reduce computational  
270 requirements, accuracy was only assessed on a subset of 50,000 non-consecutive  
271 SNPs on a single chromosome. The chromosome that we used was chromosome 5,  
272 which was selected randomly and has an intermediate size compared to the other pig  
273 chromosomes. Tests in other chromosomes gave similar results. The 50,000 variants  
274 that we tested included all the markers from the arrays that map to this chromosome

275 (~3,000), while the rest were chosen randomly from sequence variants discovered  
276 along the chromosome.

277 We measured individual-wise and variant-wise imputation accuracy with the  
278 genotype concordance, measured as the percentage of correct genotypes, and the  
279 correlation between the true genotypes and imputed dosages. The individual-wise  
280 correlation was calculated after correcting for minor allele frequency (MAF), as  
281 recommended by Calus et al. [32]. In the context of this study, we found that the  
282 relationship between the raw correlation uncorrected for MAF and the dosage  
283 corrected for MAF was nearly linear (see Figure S1). To facilitate comparison with  
284 other studies that report the uncorrected (raw) allele dosage correlations, we found  
285 that the MAF corrected correlations of 0.75, 0.80, 0.85, 0.90, and 0.95 were  
286 respectively equivalent to the raw correlations of 0.89, 0.91, 0.93, 0.96, and 0.98. The  
287 variant-wise imputation accuracy was measured as the correlation between the  
288 imputed allele dosages and true genotypes without any correction.

### 289 ***Test 2: Factors that affect individual-wise and variant-wise imputation accuracy***

290 In this test we assessed the factors that influenced imputation accuracy in the  
291 simulated data. The simulated data was used to provide a much larger sample size  
292 where the true genotypes were known. Just as for the real data, we ran single-locus  
293 peeling only on a random subset of SNPs among all sequence variants; in this case on  
294 a total of 5,000 non-consecutive SNPs taken from across three chromosomes to  
295 reduce computational requirements, although the full set of 20 chromosomes were  
296 simulated to represent realistic genetic architecture and haplotype diversity, which  
297 was needed to ensure that the properties of AlphaSeqOpt, which is a haplotype-based  
298 method, matched those of the of real data. We assessed the factors that influenced  
299 imputation accuracy by building regression trees. The regression trees were built

300 using the data from 219,518 simulated individuals and a total of 30,000 variants  
301 (5,000 variants from each population and replicate).

302 The regression tree for the individual-wise imputation accuracy was based on  
303 the amount of information that was available for the individual itself and its close  
304 relatives (4 relationship levels: grandparents, parents, progeny, and grandprogeny).  
305 The factors included: (i) size of the population to which they belonged (15k, 30k, or  
306 65k individuals); (ii) marker array density of the individual (3 genotyping statuses:  
307 not genotyped, genotyped at LD, or genotyped at HD); (iii) number of close relatives  
308 that were genotyped at each genotyping density (12 variables; 4 relationship levels  
309 and 3 genotyping statuses); (iv) sequencing coverage of the individual; (v) number of  
310 close relatives that were sequenced and their cumulative sequencing coverage (8  
311 variables; 2 variables for each of the 4 relationship levels); and (vi) connectedness to  
312 the population, which was measured as the sum of coefficients of relationship  
313 between an individual and the rest of individuals in the pedigree. The regression tree  
314 was built using the ‘rpart’ R package [33], allowing partitions that increased the  
315 overall  $R^2$  by 0.005 at each step. Consecutive binary partitions based on the same  
316 variable were considered as multi-part.

317 The factors in the regression tree for the variant-wise imputation accuracy  
318 included: (i) size of the population (15k, 30k, or 65k individuals); (ii) MAF; (iii)  
319 relative position of the variant within a chromosome; (iv) distance of a variant to the  
320 nearest variant from the marker array (this distance was 0 if that variant was present  
321 on the marker array); (v) cumulative sequencing coverage across individuals at that  
322 variant site; and (vi) number of individuals with at least one sequencing read covering  
323 that variant site. As with the individual-wise imputation accuracy, we allowed

324 partitions that increased the overall  $R^2$  by 0.005 at each step and consecutive binary  
325 partitions based on the same variable were considered as multi-part.

326 We then used the 284 high-coverage individuals in the real data for validation,  
327 by comparing the results of the regression trees from the simulated data with the  
328 imputation accuracies observed in the real data. A regression tree was not separately  
329 created for the real data due to the small number of high-coverage individuals in our  
330 validation set. To further assess which factors affected the individual-wise imputation  
331 accuracy in the real data we fitted a linear model predicting imputation accuracy  
332 against each of the factors used for the regression tree.

### 333 ***Test 3: Impact of data misassignment and pedigree errors***

334 We tested the impact that data misassignment and pedigree errors could have  
335 on the imputation results by introducing deliberate errors to the real data. We  
336 considered three types of errors: sequence data misassignment, marker array data  
337 misassignment, and pedigree errors. For each type of error we created 284 scenarios,  
338 in which we altered the data of each of the individuals that were sequenced at high  
339 coverage in each population, one at a time. The three types of errors were defined as  
340 follows, to represent some worst-case scenarios:

341 - *Sequence data misassignment.* We replaced the sequence data of the target  
342 individual by that of a random individual from the same population that had been  
343 sequenced at high coverage.

344 - *Marker array data misassignment.* We replaced the marker array data of the  
345 target individual by that of a random individual from the same population that had  
346 been genotyped at HD, regardless of its own genotyping status or density.

347 - *Pedigree errors.* We assigned a random progeny from one of the individuals  
348 sequenced at high coverage from the same population to the target individual.

349           The impact of the data misassignment and pedigree errors on imputation  
350 accuracy was measured as the correlation between the allele dosages using the correct  
351 data and the erroneous data. The impact of these errors was assessed on the target  
352 individual where the error was introduced but also on its grandparents, parents,  
353 progeny, and grandprogeny to evaluate how the errors could propagate to relatives of  
354 the target individual. In the case of the pedigree errors we also assessed the impact of  
355 the pedigree error on the misassigned progeny and grandprogeny. As a control we  
356 also assessed the allele dosage correlation on the target individual and its relatives  
357 when the data of the target individual was removed, as performed in Test 1.

358

359

## Results

### Imputation accuracy in populations of different size

#### 360 *Individual-wise imputation accuracy*

361           The imputation accuracy in the real data was high for most of the tested  
362 individuals. The average individual-wise dosage correlation was 0.94 but there was  
363 substantial variation with an asymmetrical distribution (median: 0.97; min: 0.11; max:  
364 1; interquartile range: 0.94-0.98). The average individual-wise genotype concordance  
365 was 97.1% (median: 98.4%; min: 78.9%; max: 100%; interquartile range: 97.1-  
366 98.9%). Some of the oldest individuals that belonged to the earliest generations of the  
367 pedigree (some of the 106 individuals located in the first 20% of the pedigree) had  
368 lower imputation accuracy than individuals in the remainder of pedigree, who had  
369 consistently high imputation accuracy. This pattern was observed for all four  
370 populations. Figure 1 shows the imputation accuracy, measured as the individual-wise  
371 dosage correlation, plotted against relative position in the pedigree, the marker array



372 density of the individual, or size of the population to which they belonged. Figure 2  
373 shows the same but with imputation accuracy measured as the individual-wise  
374 genotype concordance. The imputation accuracy of the individuals in later generations  
375 (the 178 individuals after the first 20% of the pedigree) was higher (Figures S2 and  
376 S3), with an average dosage correlation of 0.97 and with much lower variability  
377 (median: 0.98; min: 0.69; max: 1; interquartile range: 0.96-0.99), and an average  
378 genotype concordance of 98.3% (median: 98.7%; min: 86.9%; max: 100%;  
379 interquartile range: 98.3-99.0%).

380         The marker array density of the individuals was confounded with the number  
381 of ancestors that were genotyped with marker arrays. The non-genotyped individuals  
382 (n=19) and approximately half of the individuals genotyped at HD (n=87 out of 157)  
383 belonged to early generations of the pedigree (Figures 1a and 2a), which reduced the  
384 chances that they had ancestors with data and penalized the imputation accuracy for  
385 these two groups of individuals (Figures 1b and 2b). On the contrary, most individuals  
386 genotyped at LD belonged to later generations (n=91 out of 108), ensuring that their  
387 ancestors had enough data to enable high imputation accuracies for the LD individuals.  
388 The average dosage correlation for the non-genotyped individuals was 0.81, for the  
389 HD individuals was 0.94, and for the LD individuals was 0.96. The average dosage  
390 correlation for the HD individuals in the earliest generations was lower (0.91) than for  
391 the HD individuals in later generations (0.97). For individuals in the later generations  
392 there were no significant differences between marker array densities and the average  
393 dosage correlation of both the HD and LD individuals was 0.97 (Figures S2b and  
394 S3b). There was no clear trend that population size affected imputation accuracy  
395 (Figures 1c and 2c), especially for individuals in the later generations (Figures S2c  
396 and S3c). The population with 35k individuals had higher imputation accuracy than

397 the other three populations but this was more likely due to population-specific  
398 characteristics, related to unbalanced distributions of the tested individuals across  
399 generations and genotyping statuses or potentially to pedigree structure, rather than  
400 population size. The 35k population had only 5 out of 65 individuals in the first 20%  
401 of the pedigree, compared to a much greater proportion in the other populations (from  
402 15 out of 37 in the 15k population to 56 out of 92 in the 65k population).

### 403 *Variant-wise imputation accuracy*

404 The variant-wise imputation accuracy was also high. The average variant-wise  
405 dosage correlation was 0.88 (median: 0.96; min: -0.33; max: 1; interquartile range:  
406 0.92-0.99) and the average variant-wise genotype concordance was 96.3% (median:  
407 97.8%; min: 24.3%; max: 100%; interquartile range: 95.4-100%). Variant-wise  
408 dosage correlations were much higher when the individuals from the first 20% of the  
409 pedigree, which had lower individual-wise imputation accuracy, were excluded from  
410 the calculation. The average variant-wise dosage correlation calculated from the 178  
411 individuals after the first 20% of the pedigree was 0.93 (median: >0.99; min: -0.46;  
412 max: 1; interquartile range: 0.97-1) and the average variant-wise genotype  
413 concordance was 97.4% (median: 100%; min: 13.3%; max: 100%; interquartile range:  
414 97.9-100%).

415 Variant-wise imputation accuracy was lower for low-frequency variants,  
416 compared to more common variants. Figure 3 shows the distribution of the dosage  
417 correlation for variants across the MAF spectrum. The only MAF category where the  
418 average dosage correlation decreased when the individuals from the first 20% of the  
419 pedigree were excluded was for  $MAF \leq 0.001$  (Figure 3b), likely because the  
420 individuals in the early generations were biased towards the major allele, which  
421 would inflate imputation accuracy for low MAF variants (the major allele is more

422 likely to be true). Figure S4 shows the distribution of the genotype concordance for  
423 variants across the MAF spectrum. Note that the genotype concordance increases at  
424 lower MAF because the probability that the true genotype is the most common one  
425 increases, highlighting that genotype concordance is misleading as a measure of  
426 imputation accuracy and thus should be interpreted with care [34,35].

427

### **Factors that affect individual-wise imputation accuracy**

428         The main factors that determined individual-wise imputation accuracy were  
429 whether the individual itself was genotyped with a marker array, the number of close  
430 relatives of that individual that were genotyped with a marker array (primarily parents  
431 and grandparents), and the connectedness of that individual to the rest of the  
432 population. The number of close relatives of an individual that were sequenced was a  
433 significant factor for the imputation accuracy of the 284 tested individuals in a linear  
434 model, but only the number of sequenced parents or progeny were influential  
435 partitioning factors in the regression trees based on the simulated data. The  
436 sequencing status of the individual itself or the sequencing coverage of its relatives  
437 were not influential partitioning factors in the regression trees. The results were  
438 consistent between the simulated and the real data.

439         The regression tree for the factors that affect individual-wise dosage  
440 correlations in the simulated data is shown in Figure 4a. The first partitioning factor  
441 was the availability of marker array data of the grandparents. Individuals without  
442 genotyped grandparents had much lower imputation accuracy (0.47, n=10,794) than  
443 individuals with at least one genotyped grandparent (0.96, n=208,724). In contrast,  
444 the number of genotyped parents was not an influential partitioning factor. A likely  
445 explanation for this observation was that the number of genotyped grandparents and

446 the number of genotyped parents in the populations were confounded. Specifically, if  
447 an individual had genotyped grandparents it was likely that it also had genotyped  
448 parents because non-genotyped grandparents were likely to be individuals from very  
449 early generations (e.g., the base generation) and most individuals with progeny in  
450 subsequent generations were genotyped. For individuals without genotyped  
451 grandparents, other sources of information from the ancestors, such as availability of  
452 any sequenced parents, increased their imputation accuracy from 0.40 (n=7,516) to  
453 0.63 (n=3,278). After these initial partitions, the next partitioning factor was whether  
454 or not the individual itself was genotyped with a marker array, regardless of marker  
455 array density. This partition revealed an asymmetry in that individuals without  
456 genotyped grandparents or with only one genotyped grandparent were mostly not  
457 genotyped themselves (n=6,877 out of 7,516 individuals without any genotype data  
458 from their ancestors), whereas the individuals with genotyped grandparents were  
459 mostly genotyped (n=194,104 out of 208,724 individuals with genotyped  
460 grandparents). For non-genotyped individuals, having some genotyped or sequenced  
461 progeny and grandprogeny improved their imputation accuracy. For genotyped  
462 individuals, regardless of genotyping density, connectedness to the rest of the  
463 population was the main factor that determined imputation accuracy, with the dosage  
464 correlation increasing with connectedness from 0.89 (n=9,446) to 0.98 (n=184,658).

465 The regression tree for the factors that affect individual-wise genotype  
466 concordance in the simulated data is shown in Figure 5a. It had a similar pattern to  
467 that observed for the dosage correlation. The first partitioning factor was whether or  
468 not the individual itself was genotyped with a marker array. For non-genotyped  
469 individuals, the next partitioning factors were the availability of marker array data of  
470 the grandparents, the parents (if none or only one grandparent were genotyped), and

471 progeny. As the number of genotyped close relatives increased, genotype  
472 concordances of the non-genotyped individuals increased from 69.6% (n=8,834) to  
473 93.7% (n=5,022). For genotyped individuals, the next partitioning factor was the  
474 connectedness to the rest of the population. The genotype concordance increased with  
475 connectedness from 88.4% (n=6,680) to 98.6% (n=152,322). In individuals with low  
476 connectedness, availability of marker array data of the grandparents helped improve  
477 their genotype concordance.

478         The dosage correlations and genotype concordances observed in the real data  
479 were consistent with the partitions of the regression tree based on the simulated data  
480 (Figures 4b and 5b). The analysis of the factors that affected the individual-wise  
481 imputation accuracy observed in the real data with a linear model largely supported  
482 these patterns. Table 2 summarises the factors that were significantly associated with  
483 individual-wise imputation accuracy when measured as dosage correlations or  
484 genotype concordances. Broadly, the significant factors were the same for both  
485 measures of imputation accuracy. The significant factors included the number of  
486 genotyped ancestors, but not the number of genotyped descendants, and the number of  
487 sequenced relatives, but generally not their cumulative sequencing coverage. The  
488 number of parents genotyped with marker arrays at both LD and HD were generally  
489 significant factors ( $p$ -value $\leq$ 0.001). The number of grandparents genotyped was also  
490 significant at HD ( $p$ -value $\leq$ 0.016) but not at LD ( $p$ -value $\geq$ 0.614). The number of  
491 genotyped progeny and grandprogeny were not significant factors ( $p$ -value $\geq$ 0.062).  
492 The number of sequenced ancestors and descendants were also significant factors ( $p$ -  
493 value $\leq$ 0.016). The cumulative sequencing coverage of the parents and grandprogeny  
494 was significant ( $p$ -value=0.016 to 0.044) but not that of the grandparents and progeny  
495 ( $p$ -value $\geq$ 0.100). The factors that referred to the amount of information available for

496 the individuals themselves were also significant, including both their genotyping  
497 status ( $p$ -value $\leq$ 0.001) and their connectedness to the rest of the population ( $p$ -  
498 value $\leq$ 0.031). However, the marker array density was confounded with the generation  
499 to which the individuals belonged and, therefore, with the number of ancestors that  
500 were genotyped with marker arrays (Figure 1). Population size was also a significant  
501 factor ( $p$ -value $\leq$ 0.001), but likely confounded with population-specific factors (Figure  
502 1).

503

### **Factors that affect variant-wise imputation accuracy**

504 The main factors that determined the variant-wise imputation accuracy were  
505 the MAF of the variants and the number of sequenced individuals or the cumulative  
506 sequencing coverage at the variant site. Whether a marker was present in the marker  
507 array or not and the distance of a variant to the nearest variant from the marker array  
508 were not influential partitioning factors in the regression trees. The relative position of  
509 the variants within the chromosome was used as an influential partitioning factor in  
510 the regression tree of the variant-wise genotype concordance but not of the dosage  
511 correlation. The results were consistent between the simulated and the real data.

512 The regression tree for the factors that affect variant-wise dosage correlations  
513 on the simulated data is shown in Figure 6a. The first factor that determined variant-  
514 wise imputation accuracy was MAF. The imputation accuracy was limited for very  
515 rare variants: 0.23 for MAF below 0.001 ( $n=704$ ), 0.50 for MAF between 0.001 and  
516 0.005 ( $n=1,217$ ), 0.79 for MAF between 0.005 and 0.028 ( $n=2,111$ ), and 0.93 for  
517 MAF above 0.028 ( $n=25,968$ ). Other partition factors were the number of individuals  
518 with sequencing coverage at a given position, the cumulative sequencing coverage at  
519 a given position, and population size. The dosage correlations observed in the real

520 data within each partition of the regression tree followed the same trends as for the  
521 simulated data, but ranged from 0.51 (n=11,312) to 0.93 (n=89,701) and were greater  
522 than those from the simulated data, especially at low MAF (Figures 6b).

523 The regression tree for the factors that affect variant-wise genotype  
524 concordance in the simulated data is shown in Figure 7a. The genotype concordances  
525 showed the opposite trend with MAF than the dosage correlations, with values from  
526 99.0% for MAF below 0.050 (n=5,537) to 93.9% for MAF above 0.154 (n=18,230).  
527 For variants with MAF greater than 0.050, the average imputation accuracy increased  
528 with the number of individuals that had at least one sequence read covering a given  
529 position, from 94.8% (n=1,589) to 97.5% (n=4,644), when MAF was between 0.050  
530 and 0.154, or from 86.1% (n=299) to 95.0% (n=12,668), when MAF was above 0.154.  
531 The relative position of the variant within a chromosome was an influential  
532 partitioning factor in the case of variants with high MAF and a high number of  
533 sequenced individuals. The variants at the extreme ends of the chromosome tended to  
534 be imputed with lower accuracy (90.5%; n=152) than those at intermediate positions  
535 (94.5%; n=7,786). This variable was not an influential partitioning factor in the  
536 regression tree of the dosage correlations. The genotype concordances observed in the  
537 real data were consistent with the partitions of the regression tree based on the  
538 simulated data (Figures 7b).

539

### **Impact of data misassignment and pedigree errors**

540 Data misassignment and pedigree errors can have drastic consequences on the  
541 imputation results. The impact of data misassignment and pedigree errors, measured  
542 as the dosage correlation between the results with and without the deliberate error, is  
543 presented in Figure 8 for the target individual ('ind') and its immediate relatives. We

544 report here the average dosage correlation but note that there was large case-by-case  
545 variability due to the stochasticity of the data misassignment and pedigree errors.

546 When we removed the high-coverage sequence data of the target individual, as  
547 in Test 1 (Figure 8a), the dosage correlation with complete data imputation was 0.94  
548 for the target individual. The impact of removing the sequence data of the target  
549 individual had a limited impact on imputing its relatives, which had dosage  
550 correlations of 0.97 to 0.99 compared to the case with complete data.

551 When the sequence data was misassigned (Figure 8b), the dosage correlation  
552 of the target individual drastically decreased to 0.13, as did (in order of magnitude)  
553 that of its progeny (0.68), then its grandprogeny (0.86) and parents (0.86), and finally  
554 its grandparents (0.95).

555 When the marker array data was misassigned (Figure 8c), the dosage  
556 correlation of the target individual remained very high (0.99), probably because the  
557 high-coverage sequence data provided high certainty about its true genotypes. Despite  
558 this, potential errors in the segregation probabilities resulted in dosage correlations for  
559 the relatives of the target individual that were slightly lower (0.97 to 0.98) and  
560 showed a greater dispersion.

561 Finally, when the pedigree was misassigned (Figure 8d), the impact of such  
562 errors depended on the number of true and misassigned relatives that the target  
563 individual had. In our test the target individual was misassigned progeny from one of  
564 the individuals sequenced at high coverage. The dosage correlation of the target  
565 individual greatly decreased (0.65). The greatest impact of the pedigree errors was on  
566 the misassigned progeny (0.74), but the impact on the true progeny was also large  
567 (0.83). The impact was smaller on the misassigned grandprogeny (0.89) and the true  
568 grandprogeny (0.90). The dosage correlation of the parents and grandparents of the



569 target individual were largely unchanged (0.99 and 0.98, respectively), probably  
570 because they had other correctly assigned relatives (like their own parents) that  
571 contributed more accurate data.

572

573

## Discussion

574 In this paper we present the results of a large-scale sequencing study that  
575 aimed to generate accurately imputed whole-genome sequence information on  
576 hundreds of thousands of individuals. Our results show that we were able to obtain  
577 highly accurate sequence information for approximately 230,000 individuals from  
578 four different populations that were genotyped at a maximum of 75,000 markers  
579 genome-wide, by sequencing only 2% of the individuals in each population, mostly at  
580 low coverage. We found that imputation accuracy was high for most individuals,  
581 especially for descendants of the first few generations of a pedigree. The same  
582 approach was applied to five additional populations (results not shown), providing  
583 high-quality whole-genome sequence data for a total of more than 350,000 individuals.  
584 To our knowledge this is the largest set of whole-genome sequence information  
585 assembled to date in pigs [36] or in any other livestock species (e.g., [7,37]).

586 Our results give rise to four major points of discussion: (i) the overall  
587 performance of the sequencing strategy and the approach that we used for imputing  
588 whole-genome sequence data; (ii) the individual-wise imputation accuracy; (iii) the  
589 variant-wise imputation accuracy; (iv) the comparison to other imputation methods;  
590 and (v) the implications for population-wide sequencing studies.

591

## Overall performance of the sequencing strategy and hybrid peeling

592           The overall performance of our sequencing strategy coupled with hybrid  
593 peeling was high. We were able to impute whole-genome sequence data for hundreds  
594 of thousands of individuals with a median dosage correlation of 0.97 by sequencing  
595 only about 2% of the individuals in each of our pedigreed populations. Most of the  
596 sequenced individuals were sequenced at low coverage, with 90% of the sequenced  
597 individuals at either 1x or 2x and only 6.4% of the sequenced individuals being  
598 sequenced at a high coverage of 15x to 30x. Sequencing a subset of individuals at  
599 high coverage may improve the variant discovery rates as well as provide a validation  
600 set for variants discovered with low-coverage sequence data. It is difficult to separate  
601 the contributions of the sequencing strategy and of the imputation method to the  
602 imputation accuracy. We have assessed the contribution of the sequencing strategy on  
603 imputation accuracy in a companion paper [27]. Overall, sequencing coverage does  
604 not seem a very influential factor if a sufficiently large number of individuals is  
605 sequenced and, therefore, the sequencing strategy based primarily on low-coverage  
606 sequencing that we have described enabled high imputation accuracy in real livestock  
607 populations regardless of the size of the population.

608           Our sequencing strategy and imputation method enabled high imputation  
609 accuracies of whole-genome sequence data from marker arrays with relatively low  
610 densities, of approximately 15,000 and 75,000 markers genome-wide. The low  
611 dependence on marker arrays with higher densities is in contrast to the findings of  
612 previous studies on imputation of whole-genome sequence data, which have found  
613 that marker array genotyping density was critical when using other sequencing  
614 strategies and imputation methods. For example, van Binsbergen et al. [38] found that  
615 imputing from marker arrays with a density similar to ours (50,000 markers genome-

616 wide) resulted in low accuracies (dosage correlations of up to 0.80) when using the  
617 Beagle imputation software (version 3; [39]) in cattle. Van den Berg et al. [36] found  
618 similarly low accuracies in pigs (dosage correlations of around 0.70), probably  
619 because the number of sequenced individuals was small. In order to achieve higher  
620 imputation accuracies, an intermediate step of imputation to a much higher density  
621 (700,000 markers genome-wide or similar) was previously proposed [38]. This  
622 intermediate step has been used in several studies and with other imputation methods  
623 [36,37,40,41], but this may be a drawback for populations where marker array data at  
624 such high densities is not available. We found that a combination of an appropriate  
625 sequencing strategy and hybrid peeling achieved high imputation accuracies without  
626 any intermediate imputation steps being required for the LD individuals, likely due to  
627 the ability of both methods for exploiting pedigree and existing marker array  
628 information to maximise the value of the generated whole-genome sequence data for  
629 the whole population.

630

### **Individual-wise imputation accuracy**

631 Although most of the individuals had high imputation accuracy, a small  
632 portion of individuals had much lower imputation accuracies than the rest. These  
633 individuals mostly belonged to the earliest generations of each pedigree. This  
634 reduction of imputation accuracy in the earliest generations of the pedigree was  
635 consistent with observations in previous simulation studies [15,27]. The individuals  
636 involved had very little information available for themselves and for their ancestors,  
637 i.e., many of these individuals were not genotyped with marker arrays or their parents  
638 and grandparents were not genotyped either. Ancestors are very informative for the  
639 phasing of the genotypes and availability of their marker array data determines the

640 accuracy of estimation of the segregation probabilities used in the multi-locus step of  
641 hybrid peeling, on which the subsequent single-locus step of hybrid peeling relies.

642 In a similar way, the marker array density at which the ancestors were  
643 genotyped affected imputation accuracy of an individual, regardless of the marker  
644 array density at which the individual itself was genotyped. This can be explained by  
645 the fact that parental and grandparental genotypes are needed for accurately phasing  
646 the individual's genotype and even a small number of markers suffices to capture the  
647 small number of recombinations between the individual and its parents [42]. Thus,  
648 strategies that target parents that contribute large number of progeny for genotyping at  
649 high density, such as current genotyping practices of breeding programs with genomic  
650 selection [43,44], seem appropriate.

651 Provided that the segregation probabilities were accurately estimated, high  
652 connectedness of an individual to the rest of the population enhanced its imputation  
653 accuracy by favouring the transmission of information from many relatives and by  
654 increasing the likelihood that a closely connected individual has sequence data. In  
655 livestock breeding populations, pedigrees are usually deep and individuals have a high  
656 degree of relatedness. The connectedness of the imputed individuals to a sufficient  
657 number of informative relatives with marker array or sequence data allows for high  
658 imputation accuracy (after the initial generations for which the imputation accuracy  
659 was low) even when only a small subset of individuals was sequenced at low levels of  
660 coverage.

661 It is critical to perform quality controls of the data before performing  
662 imputation to avoid any data misassignment or pedigree errors. In this study we  
663 attempted to set an upper threshold for the impact that these errors could have on the  
664 individual-wise imputation accuracy of the affected individuals as well as how these

665 errors propagate to the relatives of the affected individuals in a pedigree-based  
666 method. We found that the most serious errors occurred due to pedigree errors or  
667 assigning sequence data to a wrong individual. However, this may be distorted by the  
668 fact that all the target individuals had high-coverage sequence data. Therefore,  
669 misassignment of marker array data must not be ignored as it could also have a strong  
670 impact on imputation accuracy when it affects individuals that are not sequenced,  
671 sequenced at low coverage, or whose relatives are genotyped with low-density marker  
672 arrays. Fortunately, frameworks to detect data misassignment [45] and pedigree errors  
673 [46] have been developed. We did not test the impact that map errors could have on  
674 the imputation accuracy, but it is obvious that they would hamper the estimation of  
675 the segregation probabilities and thus imputation accuracy.

676

### **Variant-wise imputation accuracy**

677 We obtained high variant-wise imputation accuracy, especially after filtering  
678 out individuals that were likely to have low imputation accuracy. The primary factor  
679 for variant-wise imputation accuracy was MAF. This was expected, as MAF is widely  
680 known to be one of the main factors that determine imputation accuracy regardless of  
681 the imputation method, and we found, similar to other studies, that imputation  
682 accuracy was lower for variants with very low MAF [4,38,40,47].

683 The next most important factors were the total number of reads that covered  
684 that variant site and the number of individuals who had sequence data at that variant  
685 site. Low-coverage sequencing results in a sparse distribution of reads along the  
686 genome, and it is likely that only a subset of the sequenced individuals will have any  
687 reads that map to a given variant site and that the cumulative coverage across variant  
688 sites will also vary. In our study the number of individuals with some coverage and

689 the cumulative coverage may be confounded because most individuals were  
690 sequenced at 1x or 2x, but in general this indicates the importance of having as many  
691 sequenced individuals as possible with some coverage at each variant site [27], a  
692 circumstance that is favoured by sequencing strategies based on low coverage.

693 The importance of the number of individuals sequenced at a variant site also  
694 suggests that imputation accuracy could be lower in regions with extreme base  
695 compositions or particular sequence motifs that hamper read alignment [48,49]. While  
696 the complexity of a given region, namely the presence of large repeats, is another  
697 factor that could affect local imputation accuracy along a chromosome [40,50], it was  
698 not considered in our study.

699 Inferring the segregation probabilities from the flanking markers that are  
700 included in the marker array did not result in noticeably lower imputation accuracy  
701 for those variants that were not included in the marker array. Moreover, variant-wise  
702 imputation accuracy was found to be independent of the distance between the variant  
703 and the flanking markers at which the segregation probabilities were estimated. This  
704 is again the reflection of relying on pedigree and the fact that there are only few  
705 recombinations between a parent and its progeny. However, imputation accuracy  
706 tended to be lower for the markers that were at the extreme ends of the chromosome.  
707 This affected a relatively small number of variants that were located before the first  
708 marker and after the last one and therefore were not flanked on both sides by markers  
709 from the arrays. These findings differed from those of previous studies using methods  
710 based on linkage disequilibrium (Beagle, version 3; [39]), where variant-wise  
711 imputation accuracy decreased as the distance between each variant and the nearest  
712 variant in the marker array (from which imputation to whole-genome sequence data  
713 was performed) increased [38].

714

## Comparison to other imputation methods

715           We did not intend for a direct comparison of the performance of hybrid  
716 peeling with other available imputation methods because there are fundamental  
717 differences in how they exploit information (pedigree and linkage vs. linkage  
718 disequilibrium) and because sequencing strategies and imputation methods are  
719 confounded across studies. However, we have previously compared the performance  
720 of our hybrid peeling with findhap (version 4; [47]) [15] and other studies have  
721 compared other available imputation tools [40,41,47,51], including tools such as  
722 Beagle (versions 3 and 4; [39,52]), IMPUTE2 [53], findhap [47], FImpute [54], or  
723 Minimac3 [55]. Many of these methods are population-based imputation methods that  
724 use an already phased haplotype reference panel to impute genotyped individuals to  
725 whole-genome sequence data. As a consequence, previous studies of the factors that  
726 influence imputation accuracy have been primarily concerned with the design of the  
727 reference panel. Some of these concerns involve the convenience of using single-  
728 breed or multi-breed reference panels [41,51], population-specific reference panels  
729 [41,56], the availability of marker array data for the sequenced individuals or not (it  
730 removes the genotype uncertainty that otherwise would arise from sequencing at low  
731 coverage at some pre-established positions) [47], or the trade-off between number of  
732 individuals sequenced and sequencing coverage [47]. In contrast, in this paper we  
733 used a purely pedigree-based imputation algorithm. This allows us to exploit the large  
734 amount of linkage between the haplotypes of an individual and their relatives.

735

## Implications for population-wide sequencing studies

736           The coupling of an appropriate sequencing strategy [13,14,27] and an  
737 appropriate imputation method, such as hybrid peeling [15], enabled the generation of  
738 large datasets of sequenced individuals at a low cost and with high accuracy. This is a  
739 critical step for the successful implementation of whole-genome sequence data for  
740 genomic predictions, within and across breeds, as well as for fine-mapping of causal  
741 variants underlying quantitative traits, which could guide the promotion and removal  
742 of alleles by gene editing [57,58].

743           In this paper we focused on individual-wise imputation accuracy as an  
744 indicator of the value of this data for applications such as genomic prediction.  
745 Previous studies on imputation accuracy of whole-genome sequence data focused on  
746 variant-wise imputation accuracy rather than individual-wise [38,40,47]. In the  
747 context of genomic prediction, the estimate of the realized relationship between two  
748 individuals will correlate strongly with the individual-wise, but not the variant-wise,  
749 imputation accuracy [32,59]. Understanding which factors determine the variability of  
750 individual-wise, as well as variant-wise [38,40], imputation accuracy would enable  
751 accuracy-aware filtering of the imputed data prior to downstream analyses. With that  
752 purpose we used regression trees on simulated data designed to mimic the real data  
753 for identifying a small set of partitioning factors that may be used as criteria to filter  
754 out individuals with expected low imputation accuracy.

755

756

## Conclusion

757           We used hybrid peeling to impute whole-genome sequence data of hundreds  
758 of thousands of individuals from real livestock populations that were genotyped at a



759 maximum of 75,000 markers genome-wide by sequencing only 2% of the individuals  
760 of each population, mostly at low coverage. The coupling of an appropriate  
761 sequencing strategy and hybrid peeling is a powerful method for generating whole-  
762 genome sequence data in large pedigreed populations, as long as the individuals are  
763 connected to enough informative relatives with marker array or sequence data, and  
764 regardless of population size. The characterization of the factors that affect the  
765 individual-wise and variant-wise imputation accuracy of hybrid peeling can inform  
766 genotyping and sequencing strategies as well as provide accuracy-aware quality  
767 control guidelines for the imputed data before downstream analyses. The success of  
768 this sequencing strategy demonstrates the possibility of obtaining low-cost whole-  
769 genome sequence data on large pedigreed livestock populations, which is a critical  
770 step for the successful implementation of whole-genome sequence data for genomic  
771 predictions and fine-mapping of causal variants.

772

773

## **Ethics approval and consent to participate**

774 The samples used in this study were derived from the routine breeding activities of  
775 PIC.

776

## **Consent for publication**

777 Not applicable.

778

## Availability of data and material

779 The datasets generated and analysed in this study are derived from the PIC breeding  
780 programme and not publicly available.

781

## Competing interests

782 The authors declare that they have no competing interests.

783

## Funding

784 The authors acknowledge the financial support from the BBSRC ISPG to The  
785 Roslin Institute (BBS/E/D/30002275), from Genus plc, Innovate UK (grant 102271),  
786 and from grant numbers BB/N004736/1, BB/N015339/1, BB/L020467/1, and  
787 BB/M009254/1.

788

## Authors' contributions

789 RRF, AW, and JMH designed the study; RRF and CYC performed the analyses; RRF  
790 wrote the first draft; AW, GG, WOH, AJM, and JMH assisted in the interpretation of  
791 the results and provided comments on the manuscript. All authors read and approved  
792 the final manuscript.

793

## Acknowledgements

794 This work has made use of the resources provided by the Edinburgh Compute and  
795 Data Facility (ECDF) (<http://www.ecdf.ed.ac.uk/>).

796

## References

- 798 1. Pasaniuc B, Rohland N, McLaren PJ, Garimella K, Zaitlen N, Li H, et al.  
799 Extremely low-coverage sequencing and imputation increases power for genome-  
800 wide association studies. *Nat Genet.* 2012;44:631–5.
- 801 2. Daetwyler HD, Capitan A, Pausch H, Stothard P, van Binsbergen R, Brondum RF,  
802 et al. Whole-genome sequencing of 234 bulls facilitates mapping of monogenic and  
803 complex traits in cattle. *Nat Genet.* 2014;46:858–65.
- 804 3. Nicod J, Davies RW, Cai N, Hassett C, Goodstadt L, Cosgrove C, et al. Genome-  
805 wide association of multiple complex traits in outbred mice by ultra-low-coverage  
806 sequencing. *Nat Genet.* 2016;48:912–8.
- 807 4. Sanchez M-P, Govignon-Gion A, Croiseau P, Fritz S, Hozé C, Miranda G, et al.  
808 Within-breed and multi-breed GWAS on imputed whole-genome sequence variants  
809 reveal candidate mutations affecting milk protein composition in dairy cattle. *Genet*  
810 *Sel Evol.* 2017;49:68.
- 811 5. Meuwissen T, Goddard M. Accurate Prediction of Genetic Values for Complex  
812 Traits by Whole-Genome Resequencing. *Genetics.* 2010;185:623–31.
- 813 6. Druet T, Macleod IM, Hayes BJ. Toward genomic prediction from whole-genome  
814 sequence data: impact of sequencing design on genotype imputation and accuracy of  
815 predictions. *Heredity.* 2014;112:39–47.
- 816 7. Raymond B, Bouwman AC, Schrooten C, Houwing-Duistermaat J, Veerkamp RF.  
817 Utility of whole-genome sequence data for across-breed genomic prediction. *Genet*  
818 *Sel Evol.* 2018;50:27.
- 819 8. Das A, Panitz F, Gregersen VR, Bendixen C, Holm L-E. Deep sequencing of  
820 Danish Holstein dairy cattle for variant detection and insight into potential loss-of-  
821 function variants in protein coding genes. *BMC Genomics.* 2015;16.
- 822 9. Gudbjartsson DF, Helgason H, Gudjonsson SA, Zink F, Oddson A, Gylfason A, et  
823 al. Large-scale whole-genome sequencing of the Icelandic population. *Nat Genet.*  
824 2015;47:435–44.
- 825 10. Li Y, Sidore C, Kang HM, Boehnke M, Abecasis GR. Low-coverage sequencing:  
826 Implications for design of complex trait association studies. *Genome Res.*  
827 2011;21:940–51.
- 828 11. Hickey JM. Sequencing millions of animals for genomic selection 2.0. *J Anim*  
829 *Breed Genet.* 2013;130:331–2.
- 830 12. Hickey JM, Gorjanc G, Cleveland MA, Kranis A, Jenko J, Mészáros G, et al.  
831 Sequencing Millions of Animals for Genomic Selection 2.0. *Proc 10th World Congr*  
832 *Genet Appl Livest Prod WCGALP.* Vancouver, BC, Canada; 2014. p. 377.

- 833 13. Gonen S, Ros-Freixedes R, Battagin M, Gorjanc G, Hickey JM. A method for the  
834 allocation of sequencing resources in genotyped livestock populations. *Genet Sel Evol.*  
835 2017;49:47.
- 836 14. Ros-Freixedes R, Gonen S, Gorjanc G, Hickey JM. A method for allocating low-  
837 coverage sequencing resources by targeting haplotypes rather than individuals. *Genet*  
838 *Sel Evol.* 2017;49:78.
- 839 15. Whalen A, Ros-Freixedes R, Wilson DL, Gorjanc G, Hickey JM. Hybrid peeling  
840 for fast and accurate calling, phasing, and imputation with sequence data of any  
841 coverage in pedigrees. *Genet Sel Evol.* 2018;50:67.
- 842 16. Hickey JM, Kinghorn BP, Tier B, Wilson JF, Dunstan N, Werf JH van der. A  
843 combined long-range phasing and long haplotype imputation method to impute phase  
844 for SNP genotypes. *Genet Sel Evol.* 2011;43:12.
- 845 17. Hickey JM, Kinghorn BP, Tier B, van der Werf JH, Cleveland MA. A phasing  
846 and imputation method for pedigreed populations that results in a single-stage  
847 genomic evaluation. *Genet Sel Evol.* 2012;44:9.
- 848 18. Bolger AM, Lohse M, Usadel B. Trimmomatic: a flexible trimmer for Illumina  
849 sequence data. *Bioinformatics.* 2014;30:2114–20.
- 850 19. Warr A, Affara N, Aken B, Beiki H, Bickhart DM, Billis K, et al. An improved  
851 pig reference genome sequence to enable pig genetics and genomics research. *bioRxiv*  
852 [Internet]. 2019 [cited 2019 Jun 17]; Available from:  
853 <http://biorxiv.org/lookup/doi/10.1101/668921>
- 854 20. Li H. Aligning sequence reads, clone sequences and assembly contigs with BWA-  
855 MEM. *arXiv.* 2013;1303.3997v1 [q – bio.GN].
- 856 21. DePristo MA, Banks E, Poplin R, Garimella KV, Maguire JR, Hartl C, et al. A  
857 framework for variation discovery and genotyping using next-generation DNA  
858 sequencing data. *Nat Genet.* 2011;43:491–8.
- 859 22. Poplin R, Ruano-Rubio V, DePristo MA, Fennell TJ, Carneiro MO, Van der  
860 Auwera GA, et al. Scaling accurate genetic variant discovery to tens of thousands of  
861 samples. *bioRxiv* [Internet]. 2018 [cited 2019 Jun 5]; Available from:  
862 <http://biorxiv.org/lookup/doi/10.1101/201178>
- 863 23. Ros-Freixedes R, Battagin M, Johnsson M, Gorjanc G, Mileham AJ, Rounsley SD,  
864 et al. Impact of index hopping and bias towards the reference allele on accuracy of  
865 genotype calls from low-coverage sequencing. *Genet Sel Evol.* 2018;50:64.
- 866 24. Li H, Handsaker B, Wysoker A, Fennell T, Ruan J, Homer N, et al. The Sequence  
867 Alignment/Map format and SAMtools. *Bioinformatics.* 2009;25:2078–9.
- 868 25. Danecek P, Auton A, Abecasis G, Albers CA, Banks E, DePristo MA, et al. The  
869 variant call format and VCFtools. *Bioinformatics.* 2011;27:2156–8.
- 870 26. Faux A-M, Gorjanc G, Gaynor RC, Battagin M, Edwards SM, Wilson DL, et al.  
871 AlphaSim: Software for Breeding Program Simulation. *Plant Genome.* 2016;9.

- 872 27. Ros-Freixedes R, Whalen A, Gorjanc G, Mileham AJ, Hickey JM. Whole-genome  
873 imputation accuracy of hybrid peeling under different sequencing strategies. In  
874 preparation. 2019;
- 875 28. Li Y, Sidore C, Kang HM, Boehnke M, Abecasis GR. Low-coverage sequencing:  
876 Implications for design of complex trait association studies. *Genome Res.*  
877 2011;21:940–51.
- 878 29. Gorjanc G, Dumasy J-F, Gonen S, Gaynor RC, Antolin R, Hickey JM. Potential  
879 of Low-Coverage Genotyping-by-Sequencing and Imputation for Cost-Effective  
880 Genomic Selection in Biparental Segregating Populations. *Crop Sci.* 2017;57:1404.
- 881 30. Kerr RJ, Kinghorn BP. An efficient algorithm for segregation analysis in large  
882 populations. *J Anim Breed Genet.* 1996;113:457–69.
- 883 31. Meuwissen T, Goddard M. The Use of Family Relationships and Linkage  
884 Disequilibrium to Impute Phase and Missing Genotypes in Up to Whole-Genome  
885 Sequence Density Genotypic Data. *Genetics.* 2010;185:1441–9.
- 886 32. Calus MPL, Bouwman AC, Hickey JM, Veerkamp RF, Mulder HA. Evaluation of  
887 measures of correctness of genotype imputation in the context of genomic prediction:  
888 a review of livestock applications. *animal.* 2014;8:1743–53.
- 889 33. Therneau T, Atkinson B, Ripley B. rpart: Recursive Partitioning and Regression  
890 Trees (R package version 4.1-11) [Internet]. 2017. Available from: [https://CRAN.R-](https://CRAN.R-project.org/package=rpart)  
891 [project.org/package=rpart](https://CRAN.R-project.org/package=rpart)
- 892 34. Hickey JM, Crossa J, Babu R, de los Campos G. Factors Affecting the Accuracy  
893 of Genotype Imputation in Populations from Several Maize Breeding Programs. *Crop*  
894 *Sci.* 2012;52:654.
- 895 35. Rowan TN, Hoff JL, Crum TE, Taylor JF, Schnabel RD, Decker JE. A Multi-  
896 Breed Reference Panel and Additional Rare Variation Maximizes Imputation  
897 Accuracy in Cattle. *bioRxiv* [Internet]. 2019 [cited 2019 Jun 5]; Available from:  
898 <http://biorxiv.org/lookup/doi/10.1101/517144>
- 899 36. van den Berg S, Vandenplas J, van Eeuwijk FA, Bouwman AC, Lopes MS,  
900 Veerkamp RF. Imputation to whole-genome sequence using multiple pig populations  
901 and its use in genome-wide association studies. *Genet Sel Evol.* 2019;51:2.
- 902 37. Ring SC, Purfield DC, Good M, Breslin P, Ryan E, Blom A, et al. Variance  
903 components for bovine tuberculosis infection and multi-breed genome-wide  
904 association analysis using imputed whole genome sequence data. *PLOS ONE.*  
905 2019;14:e0212067.
- 906 38. van Binsbergen R, Bink MC, Calus MP, van Eeuwijk FA, Hayes BJ, Hulsege I,  
907 et al. Accuracy of imputation to whole-genome sequence data in Holstein Friesian  
908 cattle. *Genet Sel Evol.* 2014;46:41.
- 909 39. Browning BL, Browning SR. A Unified Approach to Genotype Imputation and  
910 Haplotype-Phase Inference for Large Data Sets of Trios and Unrelated Individuals.  
911 *Am J Hum Genet.* 2009;84:210–23.

- 912 40. Bolormaa S, Chamberlain AJ, Khansefid M, Stothard P, Swan AA, Mason B, et al.  
913 Accuracy of imputation to whole-genome sequence in sheep. *Genet Sel Evol.*  
914 2019;51:1.
- 915 41. Korku c P, Arends D, Brockmann GA. Finding the Optimal Imputation Strategy  
916 for Small Cattle Populations. *Front Genet.* 2019;10:52.
- 917 42. Hickey JM, Kinghorn BP, Tier B, Wilson JF, Dunstan N, Werf JH van der. A  
918 combined long-range phasing and long haplotype imputation method to impute phase  
919 for SNP genotypes. *Genet Sel Evol.* 2011;43:12.
- 920 43. Huang Y, Hickey JM, Cleveland MA, Maltecca C. Assessment of alternative  
921 genotyping strategies to maximize imputation accuracy at minimal cost. *Genet Sel*  
922 *Evol.* 2012;44:25.
- 923 44. Cleveland MA, Hickey JM. Practical implementation of cost-effective genomic  
924 selection in commercial pig breeding using imputation1. *J Anim Sci.* 2013;91:3583–  
925 92.
- 926 45. Chan AW, Williams AL, Jannink J-L. A statistical framework for detecting  
927 mislabeled and contaminated samples using shallow-depth sequence data. *BMC*  
928 *Bioinformatics.* 2018;19:478.
- 929 46. Whalen A, Gorjanc G, Hickey JM. Parentage assignment with  
930 genotyping-by-sequencing data. *J Anim Breed Genet.* 2018;136:102–12.
- 931 47. VanRaden PM, Sun C, O’Connell JR. Fast imputation using medium or low-  
932 coverage sequence data. *BMC Genet.* 2015;16:82.
- 933 48. Ross MG, Russ C, Costello M, Hollinger A, Lennon NJ, Hegarty R, et al.  
934 Characterizing and measuring bias in sequence data. *Genome Biol.* 2013;14:R51.
- 935 49. Brandt DYC, Aguiar VRC, Bitarello BD, Nunes K, Goudet J, Meyer D. Mapping  
936 Bias Overestimates Reference Allele Frequencies at the *HLA* Genes in the 1000  
937 Genomes Project Phase I Data. *G3-Genes Genomes Genet.* 2015;5:931–41.
- 938 50. Pausch H, MacLeod IM, Fries R, Emmerling R, Bowman PJ, Daetwyler HD, et al.  
939 Evaluation of the accuracy of imputed sequence variant genotypes and their utility for  
940 causal variant detection in cattle. *Genet Sel Evol.* 2017;49:24.
- 941 51. Br ndum R, Guldbrandtsen B, Sahana G, Lund M, Su G. Strategies for imputation  
942 to whole genome sequence using a single or multi-breed reference population in cattle.  
943 *BMC Genomics.* 2014;15:728.
- 944 52. Browning BL, Browning SR. Genotype Imputation with Millions of Reference  
945 Samples. *Am J Hum Genet.* 2016;98:116–26.
- 946 53. Howie BN, Donnelly P, Marchini J. A Flexible and Accurate Genotype  
947 Imputation Method for the Next Generation of Genome-Wide Association Studies.  
948 *PLoS Genet.* 2009;5:e1000529.

- 949 54. Sargolzaei M, Chesnais JP, Schenkel FS. A new approach for efficient genotype  
950 imputation using information from relatives. *BMC Genomics*. 2014;15:478.
- 951 55. Das S, Forer L, Schönherr S, Sidore C, Locke AE, Kwong A, et al. Next-  
952 generation genotype imputation service and methods. *Nat Genet*. 2016;48:1284–7.
- 953 56. Lencz T, Yu J, Palmer C, Carmi S, Ben-Avraham D, Barzilai N, et al. High-depth  
954 whole genome sequencing of an Ashkenazi Jewish reference panel: enhancing  
955 sensitivity, accuracy, and imputation. *Hum Genet*. 2018;137:343–55.
- 956 57. Jenko J, Gorjanc G, Cleveland MA, Varshney RK, Whitelaw CBA, Woolliams JA,  
957 et al. Potential of promotion of alleles by genome editing to improve quantitative  
958 traits in livestock breeding programs. *Genet Sel Evol*. 2015;47:55.
- 959 58. Johnsson M, Gaynor RC, Jenko J, Gorjanc G, de Koning D-J, Hickey JM.  
960 Removal of alleles by genome editing (RAGE) against deleterious load. *Genet Sel  
961 Evol*. 2019;51:14.
- 962 59. Whalen A, Gorjanc G, Hickey JM. Family-specific genotype arrays increase the  
963 accuracy of pedigree-based imputation at very low marker densities. *Genet Sel Evol*.  
964 2019;51:33.
- 965

## Figures

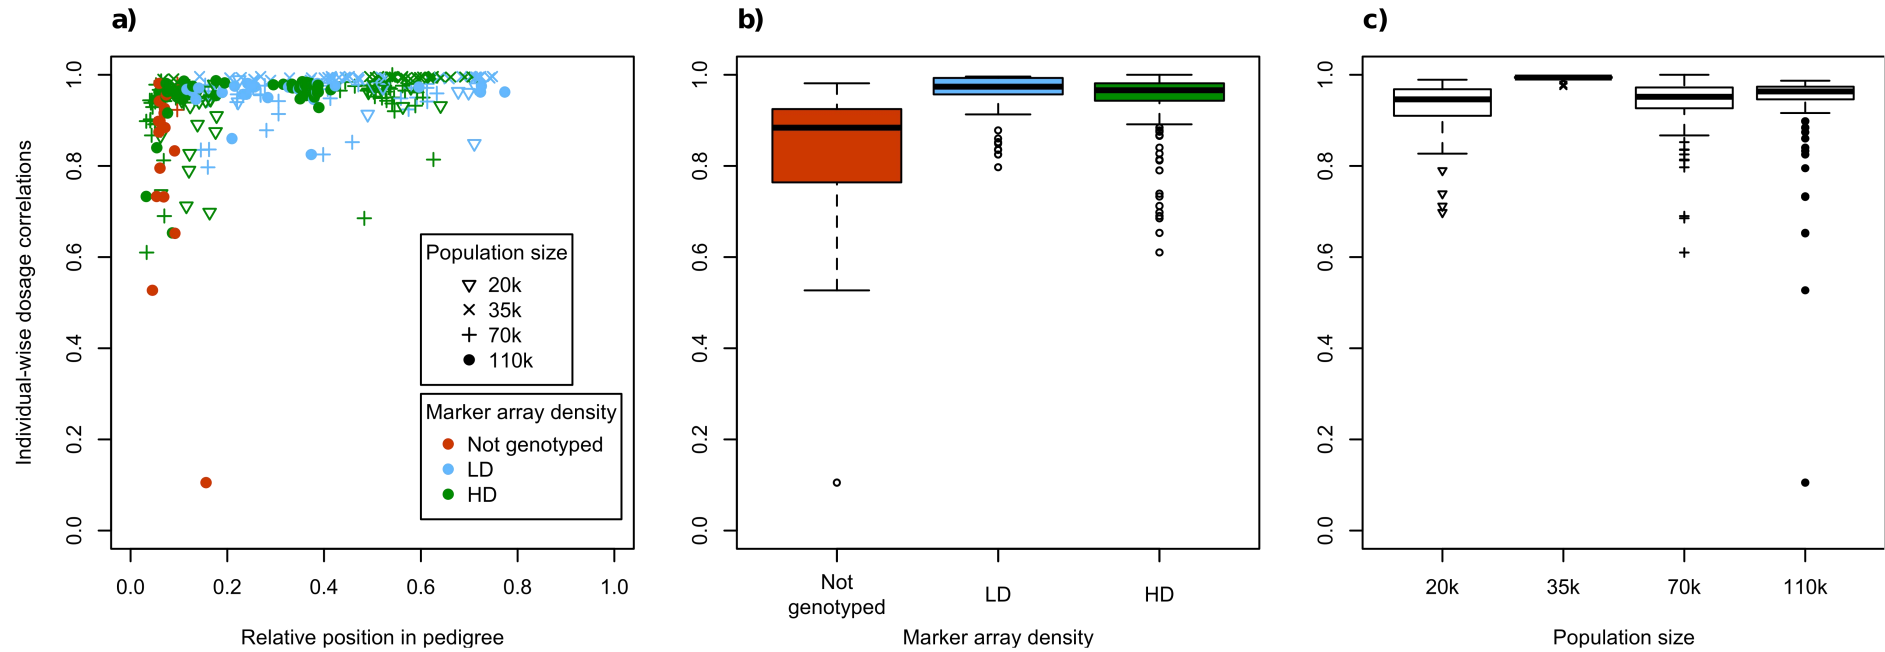

966

967 **Figure 1.** Individual-wise dosage correlation in the real data with respect to (a) relative position of the tested individuals within a pedigree, (b)

968 genotyping marker array density, and (c) population size.



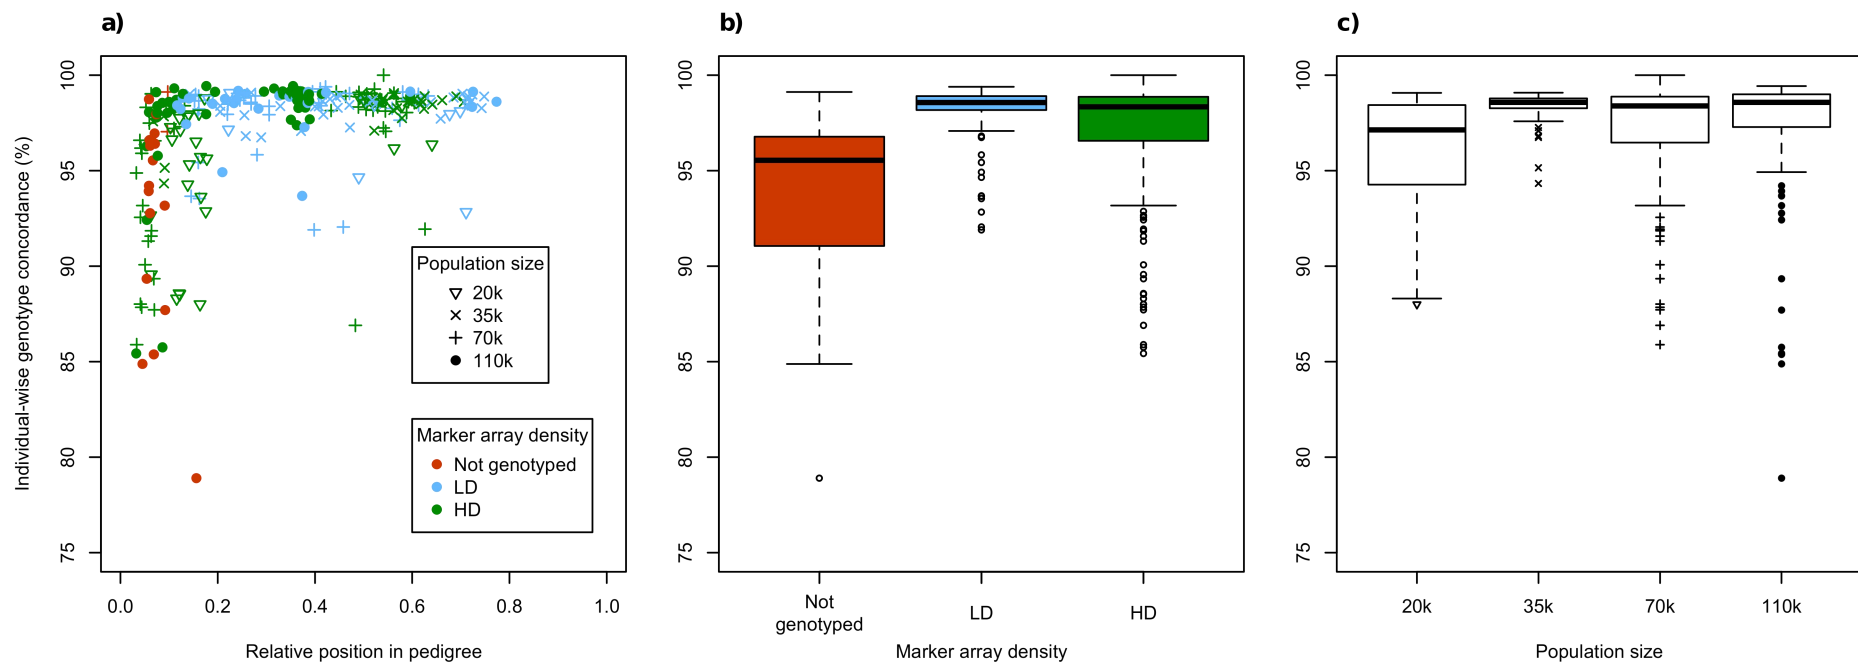

969

970 **Figure 2.** Individual-wise genotype concordance in the real data with respect to (a) relative position of the tested individuals within a pedigree,

971 (b) genotyping marker array density, and (c) population size.

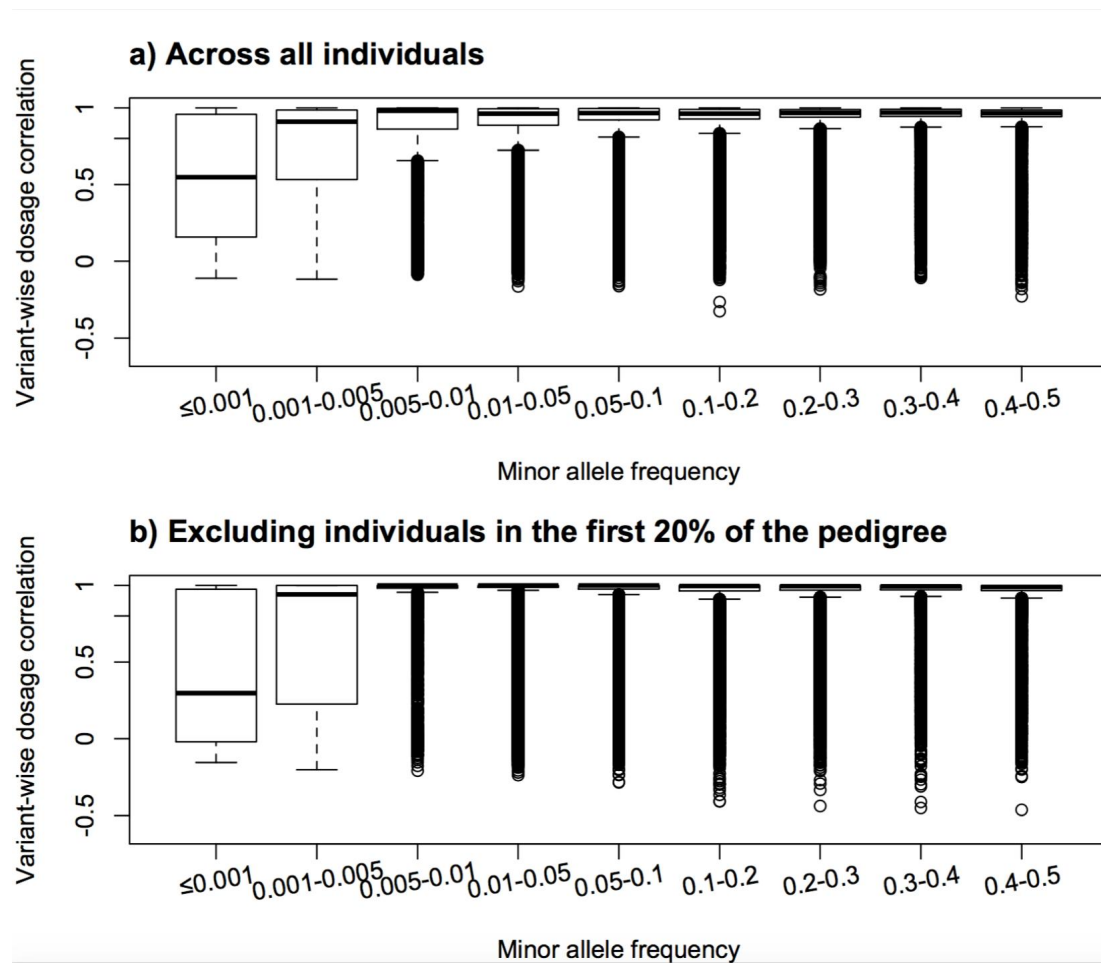

972

973 **Figure 3.** Variant-wise dosage correlation in the real data with respect to minor allele  
974 frequency. Results are shown for (a) all individuals or (b) after excluding the  
975 individuals in the first 20% of the pedigree.

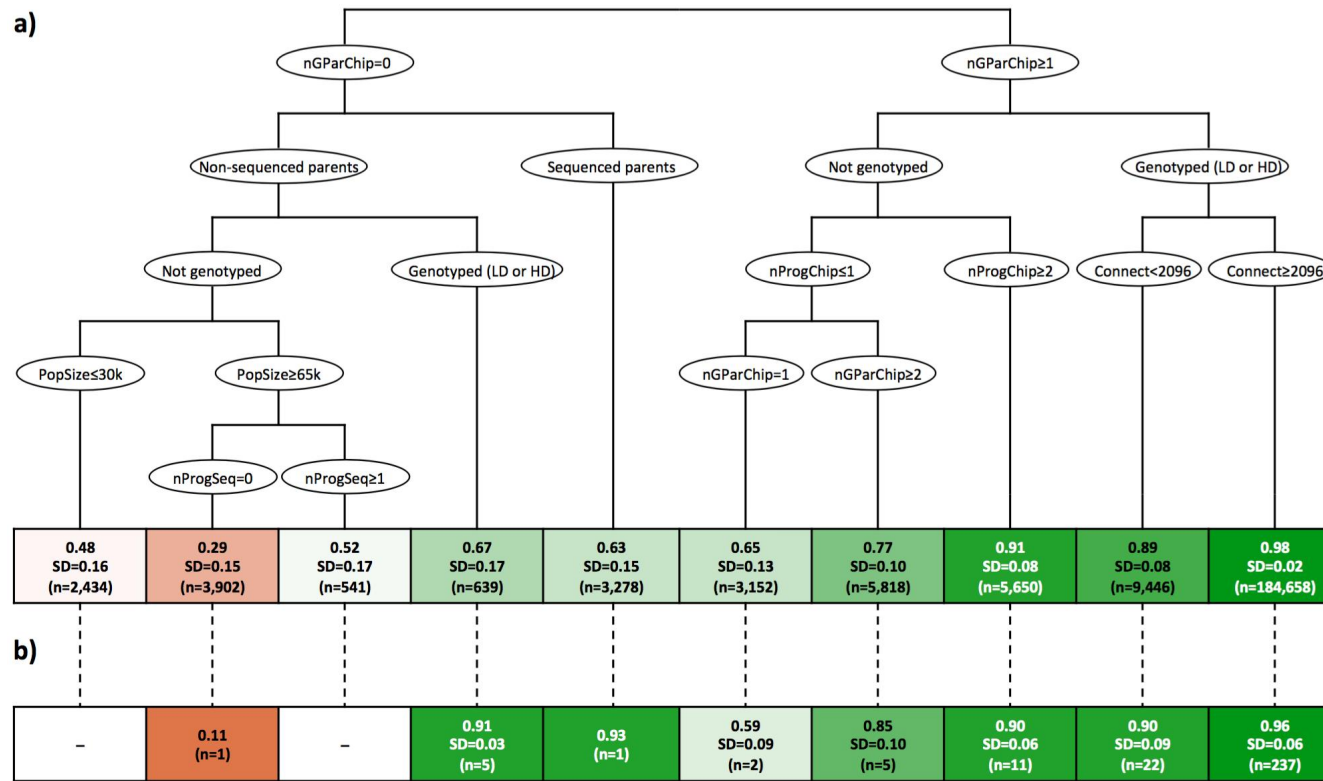

976

977 **Figure 4.** Regression tree of the factors that affected individual-wise dosage correlation in (a) the simulated data and (b) comparison to the real  
 978 data. Variables include genotype status, number of grandparents genotyped with marker array (nGParChip), number of progeny genotyped with  
 979 marker array (nProgChip), number of sequenced progeny (nProgSeq), connectedness to the rest of the population (Connect), and population size  
 980 (PopSize).

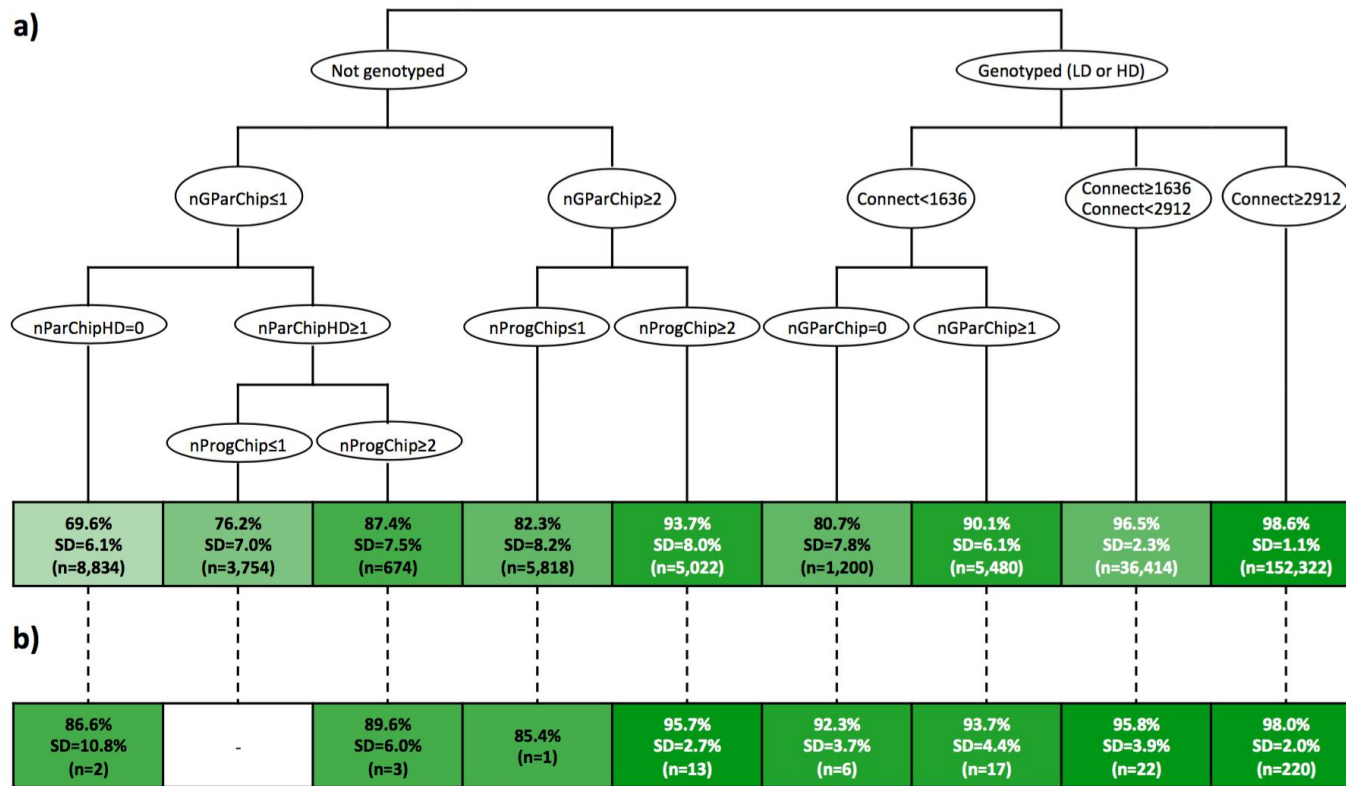

981

982 **Figure 5.** Regression tree of the factors that affected individual-wise genotype concordance in (a) the simulated data and (b) comparison to the  
 983 real data. Variables include genotype status, number of grandparents genotyped with marker array (nGParChip), number of parents genotyped  
 984 with high-density marker array (nParChipHD), number of progeny genotyped with marker array (nProgChip), number of grandprogeny  
 985 genotyped with marker array (nGProgChip), and connectedness to the rest of the population (Connect).

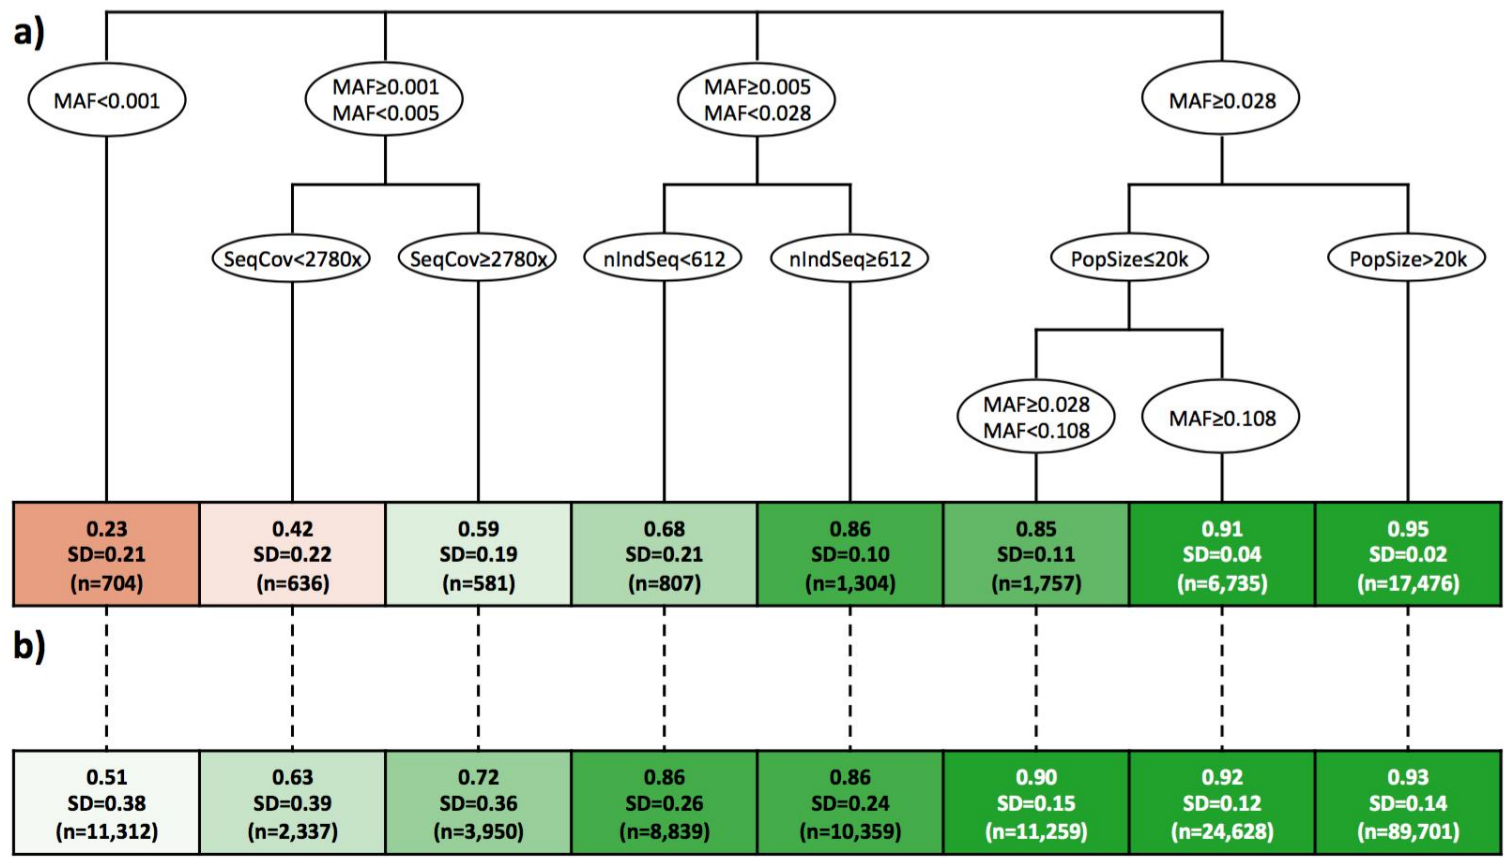

986

987 **Figure 6.** Regression tree of the factors that affected variant-wise dosage correlation in (a) the simulated data and (b) comparison to the real data.

988 Variables include minor allele frequency (MAF), number of individuals sequenced at a position (nIndSeq), cumulative sequencing coverage at a

989 position (SeqCov), and population size (PopSize).

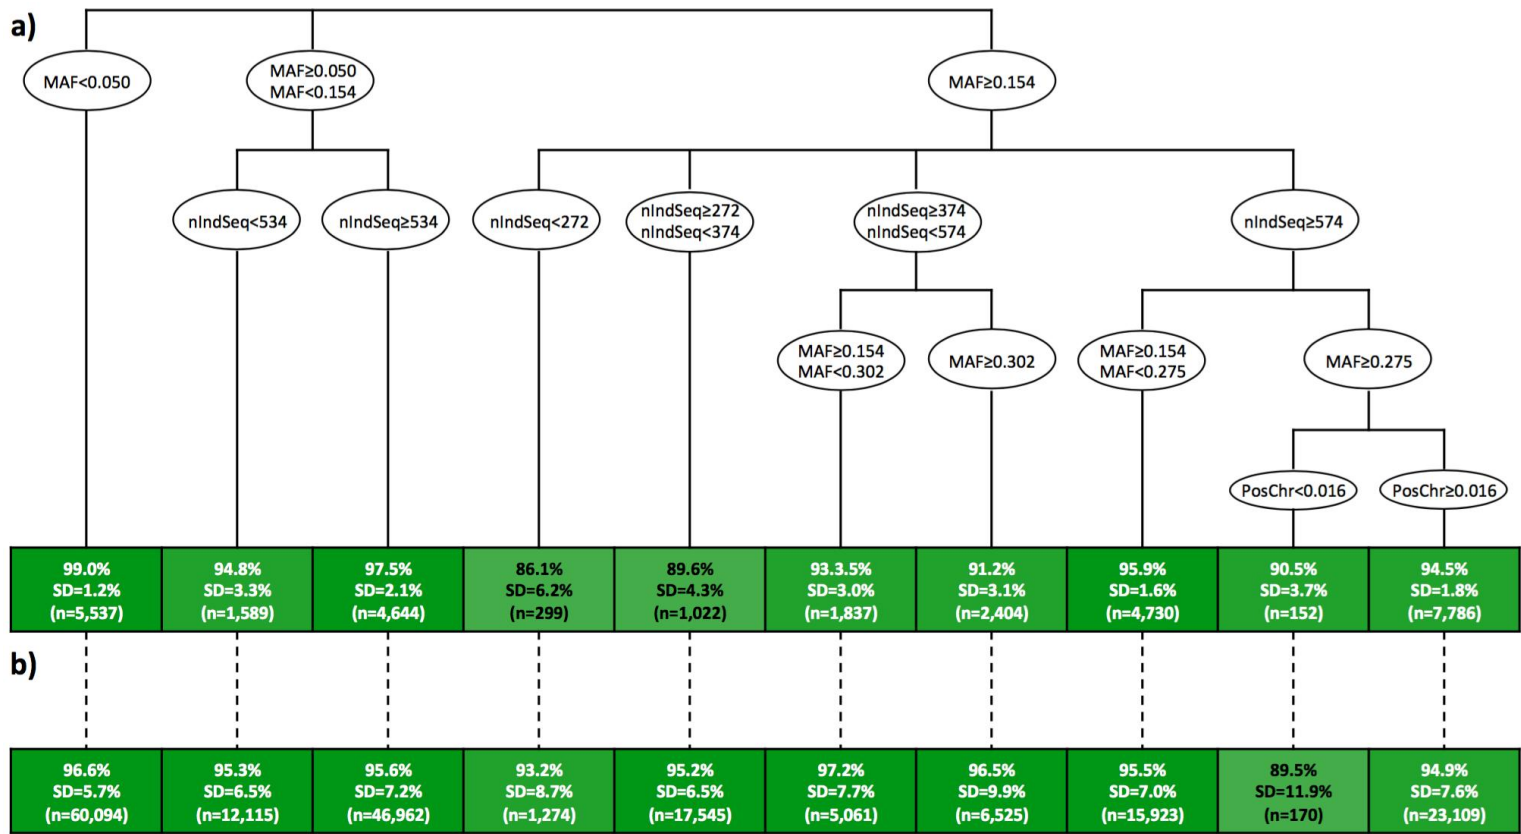

990

991 **Figure 7.** Regression tree of the factors that affected variant-wise genotype concordance in (a) the simulated data and (b) comparison to the real  
 992 data. Variables include minor allele frequency (MAF), number of individuals sequenced at a position (nIndSeq), and position of the variant  
 993 within the chromosome (PosChr).

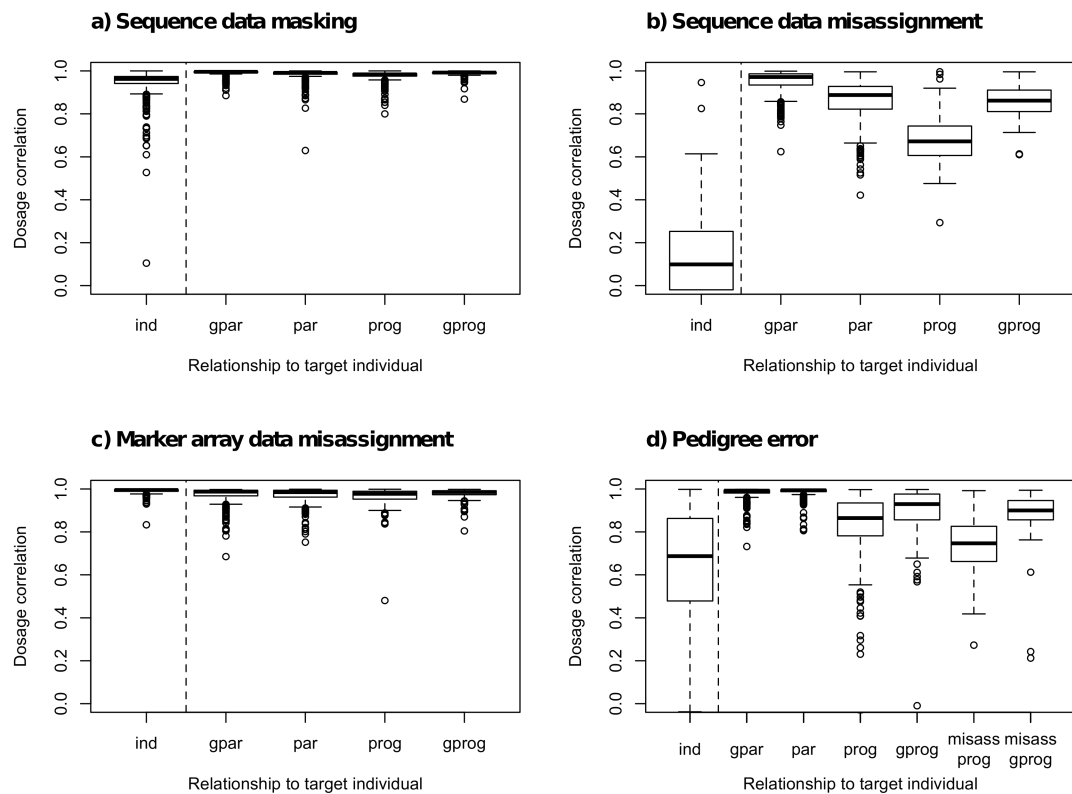

994

995 **Figure 8.** Impact of data misassignment and pedigree errors on imputation accuracy.

996 The dashed line separates the individual directly affected by the data modification

997 (ind) and its relatives (gpar: grandparents, par: parents, prog: progeny, gprog:

998 grandprogeny, misass prog: misassigned progeny, misass gprog: misassigned

999 grandprogeny). The y-axis measures the individual-wise dosage correlation between

1000 the imputed genotypes based on complete correct data and either missing or

1001 misassigned data for the individual itself and its relatives. In panel (a) we provide the

1002 case where the sequence data of the target individual was masked as in Test 1; in

1003 panel (b) where the sequence data of another individual was misassigned to the target

1004 one; in panel (c) where the marker array data was misassigned; and in panel (d) where

1005 we assigned the progeny from one of the individuals sequenced at high coverage to

1006 the target individual.

1007

## Tables

1008 **Table 1.** Distribution of sequencing coverages by population.

| Population | Individuals sequenced | Individuals sequenced by coverage |     |    |        | Total coverage |
|------------|-----------------------|-----------------------------------|-----|----|--------|----------------|
|            |                       | 1x                                | 2x  | 5x | 15-30x |                |
| 20k        | 445                   | 217                               | 176 | 15 | 37     | 1,852x         |
| 35k        | 760                   | 394                               | 274 | 27 | 65     | 3,192x         |
| 70k        | 1,366                 | 685                               | 545 | 44 | 92     | 5,280x         |
| 110k       | 1,856                 | 1,044                             | 649 | 73 | 90     | 8,190x         |

1009



1010 **Table 2.** Factors that affect individual-wise imputation accuracy on the real data (*p*-  
 1011 value).

| Factor                                          | Allele dosage correlation | Genotype concordance |
|-------------------------------------------------|---------------------------|----------------------|
| Population size                                 | <0.001 ***                | <0.001 ***           |
| Individual data                                 |                           |                      |
| Genotyping status                               | <0.001 ***                | <0.001 ***           |
| Connectedness to the rest of population         | 0.031 *                   | <0.001 ***           |
| Number of relatives genotyped with marker array |                           |                      |
| Grandparents at LD <sup>a</sup>                 | 0.707                     | 0.614                |
| Grandparents at HD <sup>a</sup>                 | 0.016 *                   | <0.001 ***           |
| Parents at LD                                   | 0.059                     | <0.001 ***           |
| Parents at HD                                   | <0.001 ***                | <0.001 ***           |
| Progeny at LD                                   | 0.062                     | 0.202                |
| Progeny at HD                                   | 0.553                     | 0.314                |
| Grandprogeny at LD                              | 0.926                     | 0.899                |
| Grandprogeny at HD                              | 0.996                     | 0.681                |
| Number of relatives sequenced                   |                           |                      |
| Grandparents                                    | 0.003 **                  | <0.001 ***           |
| Parents                                         | <0.001 ***                | <0.001 ***           |
| Progeny                                         | 0.002 **                  | <0.001 ***           |
| Grandprogeny                                    | 0.016 *                   | 0.001 **             |
| Cumulative sequencing coverage of relatives     |                           |                      |
| Grandparents                                    | 0.456                     | 0.297                |
| Parents                                         | 0.245                     | 0.021 *              |
| Progeny                                         | 0.100                     | 0.363                |
| Grandprogeny                                    | 0.044 *                   | 0.016 *              |

1012 <sup>a</sup>LD: low density; HD: high density.

1013 \**p*-value=0.05-0.01; \*\**p*-value=0.01-0.001; \*\*\**p*-value<0.001.

1014

## Supplementary Information

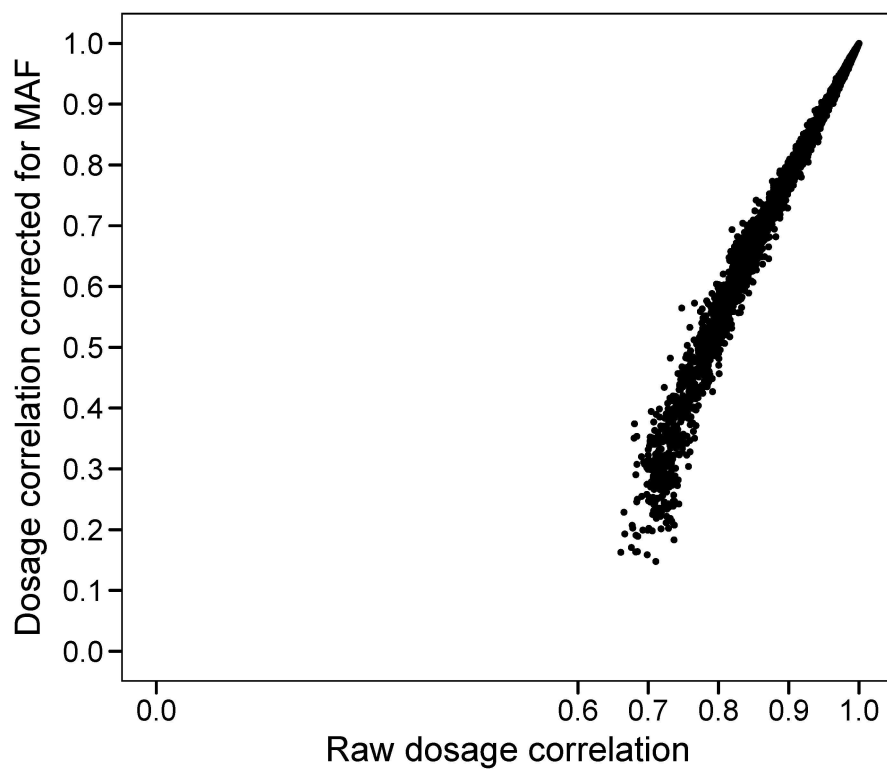

1015

1016 **Figure S1.** Relationship between raw and MAF-corrected individual-wise dosage  
1017 correlations for sequence data. Results are for simulated data with a pedigree with 30k  
1018 individuals an investment equivalent to 2% of the population sequenced at 2x.

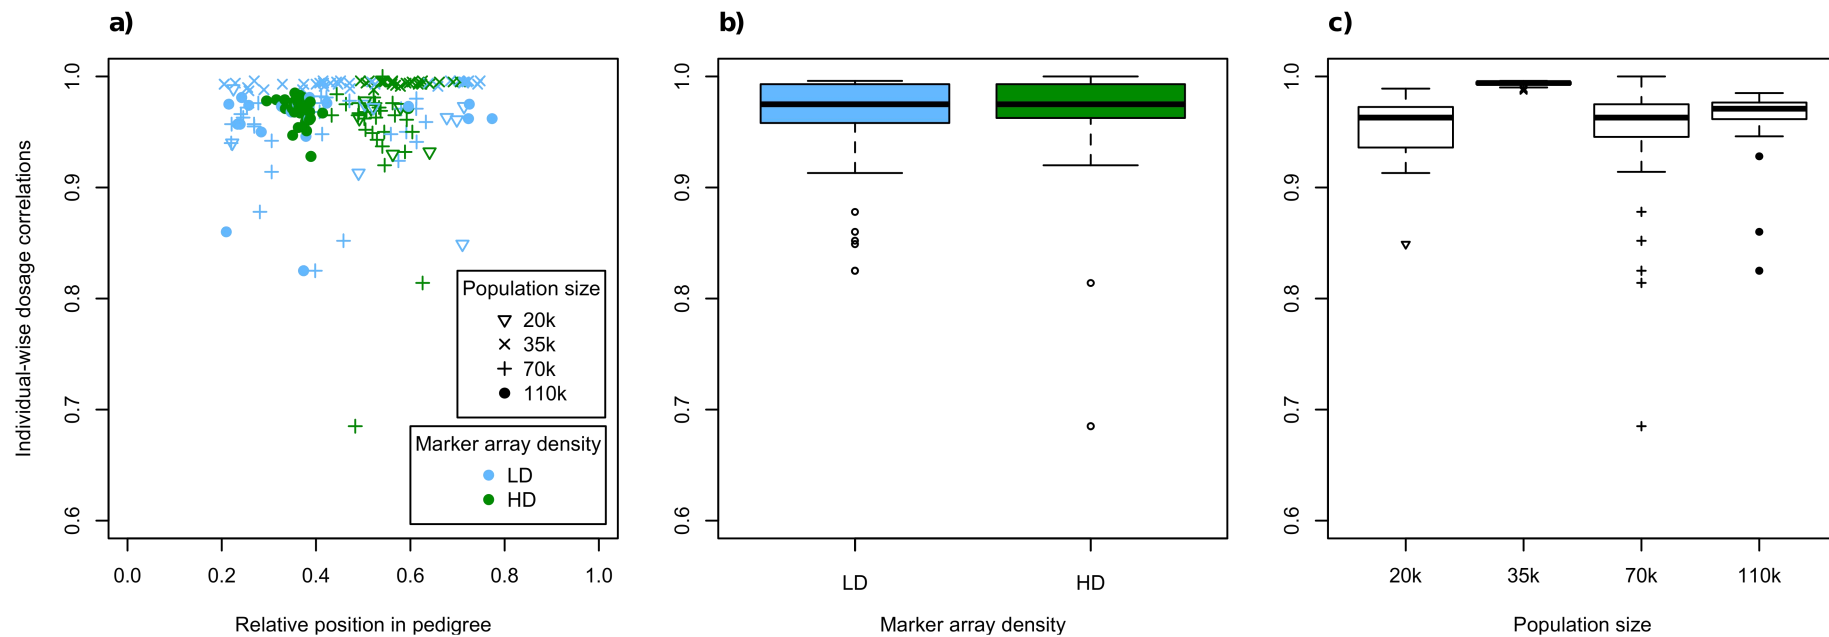

1019

1020 **Figure S2.** Individual-wise dosage correlation on the real data after excluding the individuals in the first 20% of the pedigree with respect to (a)

1021 relative position of the tested individuals within a pedigree, (b) genotyping marker array density, and (c) population size.

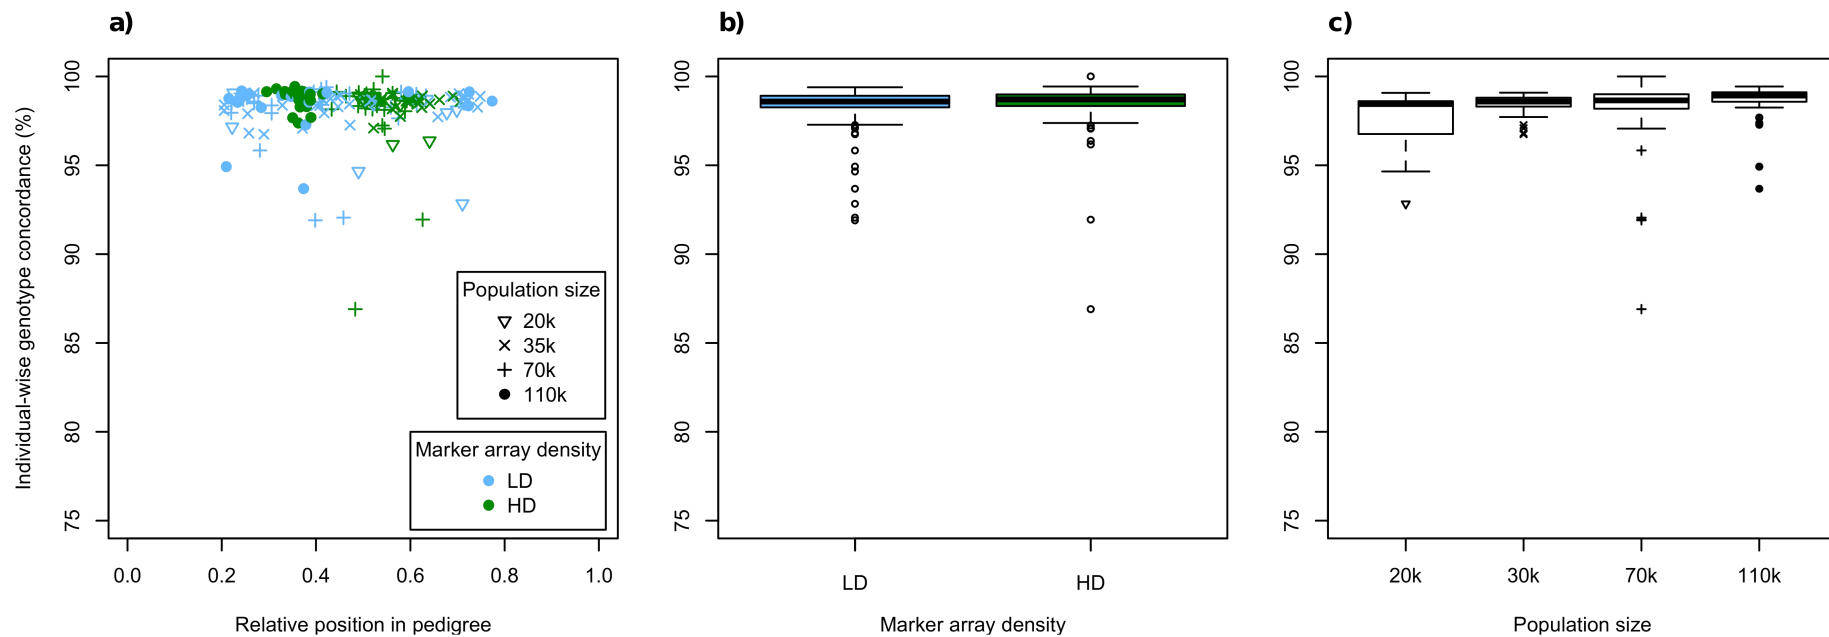

1022

1023 **Figure S3.** Individual-wise genotype concordance on the real data after excluding the individuals in the first 20% of the pedigree with respect to

1024 (a) relative position of the tested individuals within a pedigree, (b) genotyping marker array density, and (c) population size.

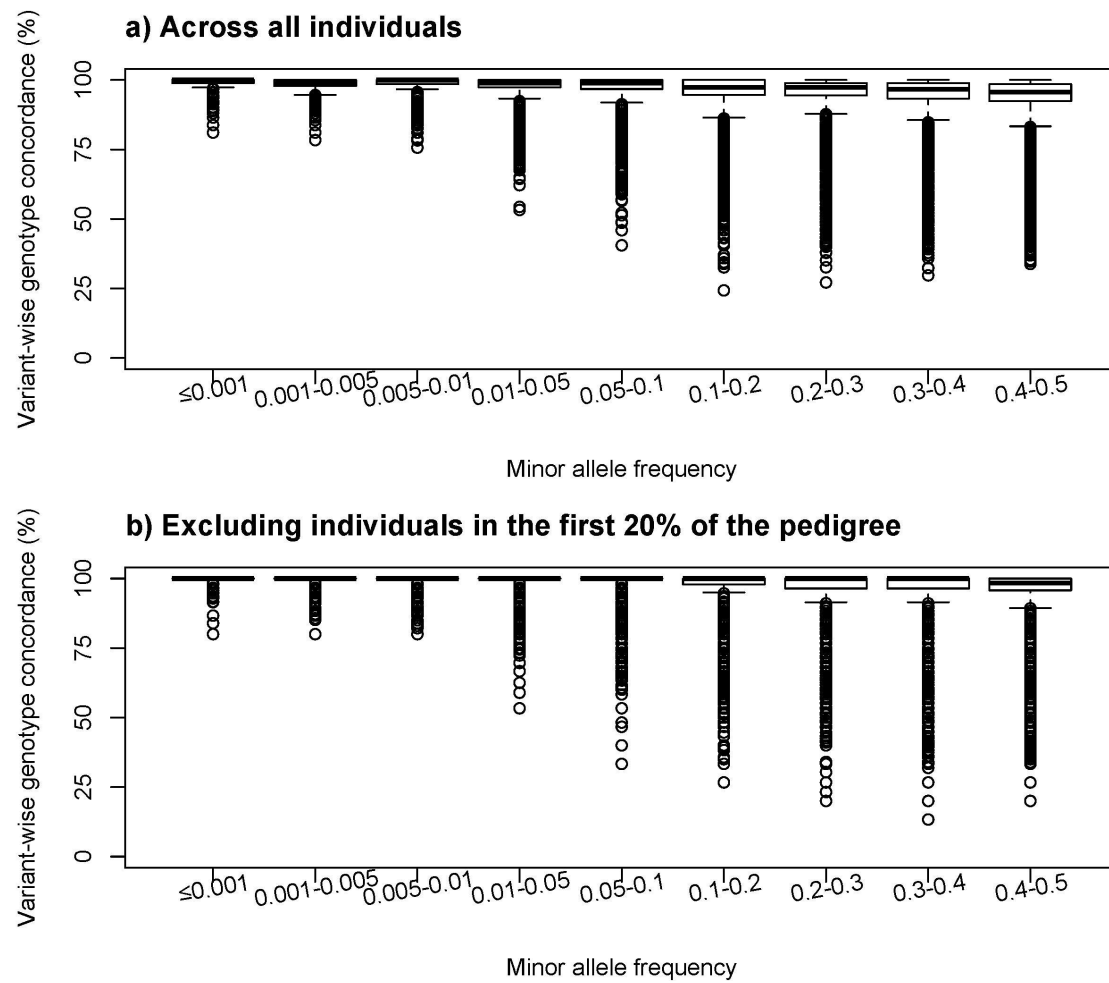

1025

1026 **Figure S4.** Variant-wise genotype concordance on the real data respect to minor allele  
1027 frequency. Results are shown for (a) all individuals or (b) after excluding the  
1028 individuals in the first 20% of the pedigree.

1029
